# Supplementary material for: Quantitative modelling of amino acid transport and homeostasis in mammalian cells
Source: PubMed Central journal article supplement (PMC8421413; doi:10.1038/s41467-021-25563-x), 2021-09-06
Supplement: 41467_2021_25563_MOESM1_ESM.pdf [file 41467_2021_25563_MOESM1_ESM.pdf]

## **Supplementary Information**

### **Quantitative modelling of amino acid transport and homeostasis in mammalian cells**

Gregory Gauthier-Coles<sup>1</sup>, Jade Vennitti<sup>1</sup>, Zhiduo Zhang<sup>2</sup>, William C. Comb<sup>3</sup>, Shuran Xing<sup>3</sup>, Kiran Javed<sup>1</sup>, Angelika Broer<sup>1</sup>, Stefan Broer\*<sup>1</sup>

Fig.S1

## U87-MG Transporter expression

| U87-MG |          | Database | mRNA | Protein | Evaluation |
|--------|----------|----------|------|---------|------------|
| EAAT3  | SLC1A1   | -0.36    | 0.33 | nd      | -          |
| EAAT2  | SLC1A2   | -1.4     | 0.08 | nd      | -          |
| EAAT1  | SLC1A3   | 3.1      | 0.56 | 0.11    | +          |
| ASCT1  | SLC1A4   | 3.5      | 0.78 | 0.25    | ++         |
| ASCT2  | SLC1A5   | 5.4      | 1.08 | 1.13    | +++        |
| EAAT4  | SLC1A6   | -1.5     | 0    | nd      | -          |
| EAAT5  | SLC1A7   | -0.1     | 0    | nd      | -          |
| rbat   | SLC3A1   | 0.33     | 0    | nd      | -          |
| 4F2hc  | SLC3A2   | 4.5      | 0.62 | nd      | +++        |
| GLYT2  | SLC6A5   | -0.5     | 0.72 | 0.03    | +          |
| PROT   | SLC6A7   | 0.4      | 0    | nd      | -          |
| GLYT1  | SLC6A9   | -0.4     | 0    | nd      | -          |
| ATB0+  | SLC6A14  | -1.1     | 0    | nd      | -          |
| BOAT2  | SLC6A15  | 2.8      | 0.5  | 0.99    | +++        |
| NTT5   | SLC6A16  | -0.7     | 0    | nd      | -          |
| NTT4   | SLC6A17  | 0.8      | 0.02 | nd      | -          |
| BOAT1  | SLC6A19  | 0        | 0    | nd      | -          |
| SIT    | SLC6A20  | -1.3     | 0    | nd      | -          |
| CAT1   | SLC7A1   | 0.9      | 0.79 | 1.48    | +++        |
| CAT2   | SLC7A2   | -1       | 0.1  | nd      | -          |
| CAT3   | SLC7A3   | -1       | 0    | nd      | -          |
| CAT4   | SLC7A4   | -0.7     | 0.3  | nd      | -          |
| LAT1   | SLC7A5   | 5.7      | 0.91 | 0.54    | +++        |
| y+LAT2 | SLC7A6   | 1.9      | 0.16 | 0.79    | +++        |
| y+LAT1 | SLC7A7   | -0.1     | 0    | nd      | -          |
| LAT2   | SLC7A8   | 0.4      | 0.52 | 0.07    | +          |
| b0+AT  | SLC7A9   | 0.2      | 0    | nd      | -          |
| asc1   | SLC7A10  | nd       | 0    | nd      | -          |
| xCT    | SLC7A11  | 1.5      | 0.9  | 0.65    | +++        |
| TAT1   | SLC16A10 | 0.1      | 0.03 | nd      | -          |
| PAT1   | SLC36A1  | -0.9     | 0.7  | nd      | -          |
| PAT2   | SLC36A2  | nd       | 0.06 | nd      | -          |
| PAT3   | SLC36A3  | nd       | 0.03 | nd      | -          |
| PAT4   | SLC36A4  | 2.8      | 0.58 | nd      | ++         |
| SNAT1  | SLC38A1  | 6.5      | 1.05 | 1.69    | +++        |
| SNAT2  | SLC38A2  | 6.4      | 1.14 | 0.01    | inducible  |
| SNAT3  | SLC38A3  | -0.7     | 0    | nd      | -          |
| SNAT4  | SLC38A4  | -1.3     | 0.14 | 0.12    | +          |
| SNAT5  | SLC38A5  | -0.1     | 0    | 0.63    | ++         |
| LAT3   | SLC43A1  | 0.3      | 0.18 | 0.02    | -          |
| LAT4   | SLC43A2  | -0.3     | 0.25 | nd      | -          |

## A549 Transporter expression

| A549   |          | Database | mRNA    | Protein | Evaluation |
|--------|----------|----------|---------|---------|------------|
| EAAT3  | SLC1A1   | -0.5     | 0.53872 | 0.00    | -          |
| EAAT2  | SLC1A2   | -1.6     | 0       | nd      | -          |
| EAAT1  | SLC1A3   | -1.3     | 0       | nd      | -          |
| ASCT1  | SLC1A4   | 3.5      | 1.55816 | 0.00    | -          |
| ASCT2  | SLC1A5   | 5.7      | 1.73847 | 1.62    | +++        |
| EAAT4  | SLC1A6   | -1.4     | 0       | nd      | -          |
| EAAT5  | SLC1A7   | -0.4     | 0       | nd      | -          |
| rbat   | SLC3A1   | 3.06     | 0.10848 | nd      | -          |
| 4F2hc  | SLC3A2   | 6.7      | 0.94904 | nd      | +++        |
| GLYT2  | SLC6A5   | -0.7     | 0.9382  | 0.00    | -          |
| PROT   | SLC6A7   | 0.2      | 0       | nd      | -          |
| GLYT1  | SLC6A9   | -0.5     | 0       | nd      | -          |
| ATB0+  | SLC6A14  | -1.4     | 0       | nd      | -          |
| BOAT2  | SLC6A15  | 0.5      | 0       | nd      | -          |
| NTT5   | SLC6A16  | 0.22     | 0.06    | nd      | -          |
| NTT4   | SLC6A17  | 0.4      | 0.18499 | nd      | -          |
| BOAT1  | SLC6A19  | 0.2      | 0       | nd      | -          |
| SIT    | SLC6A20  | -1.3     | 0       | nd      | -          |
| CAT1   | SLC7A1   | -0.6     | 1.39068 | 0.01    | -          |
| CAT2   | SLC7A2   | -0.7     | 0.1327  | nd      | -          |
| CAT3   | SLC7A3   | -1       | 0.01713 | nd      | -          |
| CAT4   | SLC7A4   | -0.7     | 0.0256  | nd      | -          |
| LAT1   | SLC7A5   | 8.5      | 1.92245 | 0.77    | +++        |
| y+LAT2 | SLC7A6   | 2.9      | 0.53168 | 0.34    | ++         |
| y+LAT1 | SLC7A7   | 4.4      | 0.09901 | nd      | -          |
| LAT2   | SLC7A8   | 0.3      | 1.29083 | 0.04    | +          |
| b0+AT  | SLC7A9   | 0.6      | 0       | nd      | -          |
| asc1   | SLC7A10  |          | 0       | nd      | -          |
| xCT    | SLC7A11  | 4.7      | 1.5445  | 0.64    | +++        |
| TAT1   | SLC16A10 | -0.3     | 0.0048  | nd      | -          |
| PAT1   | SLC36A1  | -0.9     | 0.28336 | nd      | -          |
| PAT2   | SLC36A2  |          | 0.02102 | nd      | -          |
| PAT3   | SLC36A3  |          | 0.02687 | nd      | -          |
| PAT4   | SLC36A4  | 4        | 0.60582 | nd      | -          |
| SNAT1  | SLC38A1  | 6.6      | 0.9867  | 3.56    | +++        |
| SNAT2  | SLC38A2  | 6.7      | 0.855   | 0.00    | inducible  |
| SNAT3  | SLC38A3  | -0.5     | 0       | nd      | -          |
| SNAT4  | SLC38A4  | -1.4     | 0       | 0.03    | -          |
| SNAT5  | SLC38A5  | -0.6     | 0.028   | 0.26    | +          |
| LAT3   | SLC43A1  | 0.3      | 0.24753 | 0.75    | ++         |
| LAT4   | SLC43A2  | 0.6      | 0.73334 | nd      | +          |

**Fig. S1** Evaluation of transporter expression in U87-MG glioma and A549 lung carcinoma cells. The mRNA expression levels were compiled from Oncomine (log<sub>2</sub> normalised mRNA expression) and analysed by RT-PCR (normalised to clathrin intensity). Red indicates high level of expression, blue indicates low levels of expression. High levels of mRNA expression were correlated to western blotting (normalised to Na<sup>+</sup>/K<sup>+</sup>-ATPase intensity e= 3). Overall evaluation was based on the combined dataset. +++ high activity expected, ++ activity expected to be readily detectable, + marginal activity, - no activity expected. The activity of SNAT2 is inducible and may not be detectable in cells exposed to freshly media.

U87-MG

A549

Fig.S2

**Slc 1**

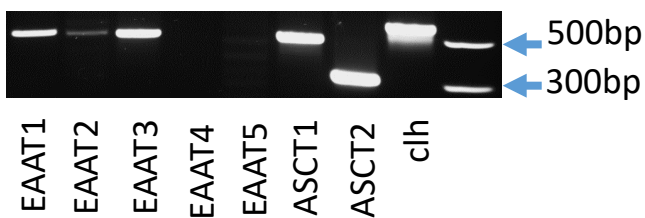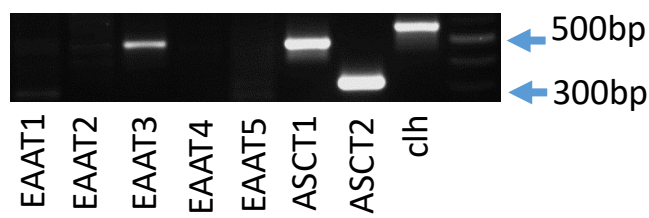

**Slc 3**

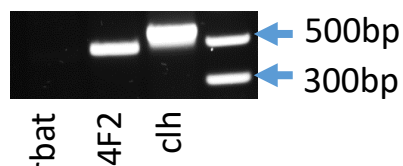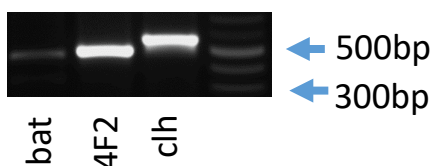

**Slc 6**

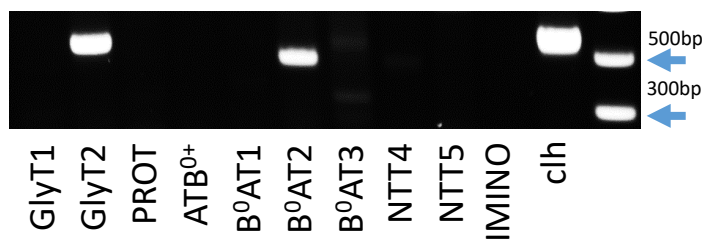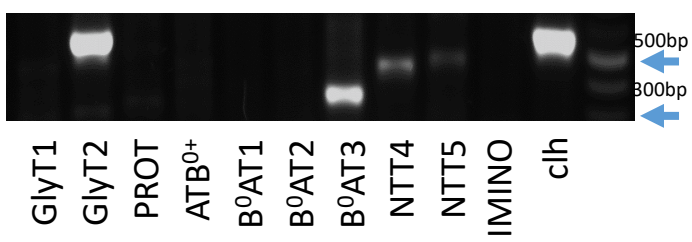

**Slc 7**

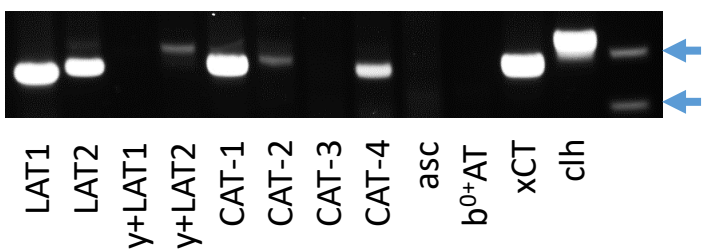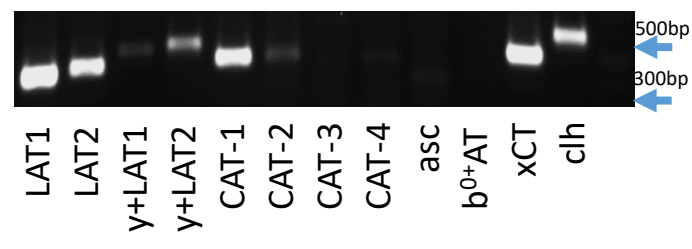

**Slc 16**

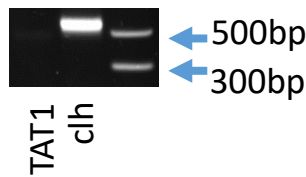

**Slc 43**

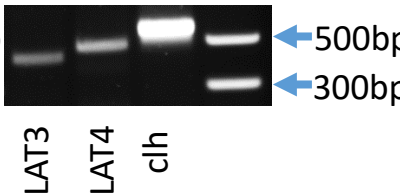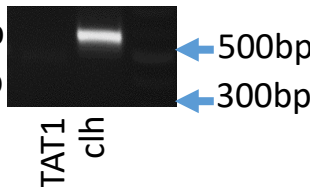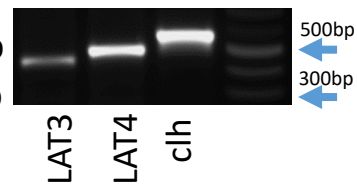

**Slc 36**

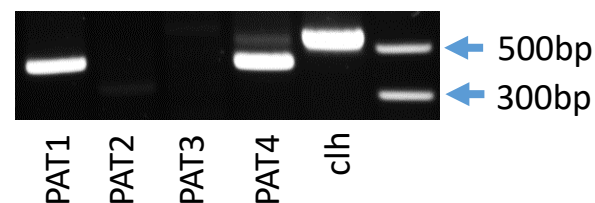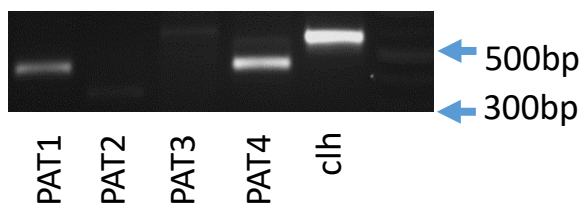

**Slc 38**

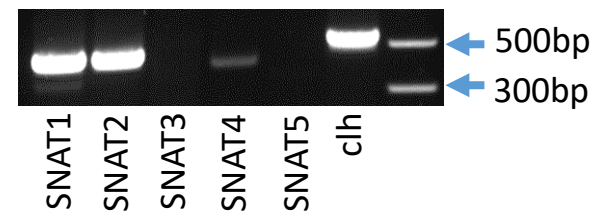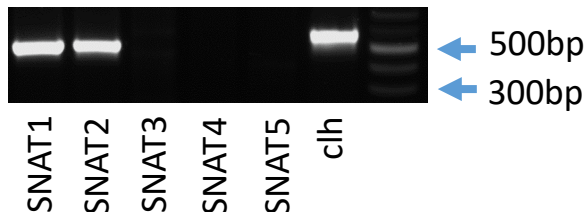

**Fig. S2:** Analysis of transporter expression by RT-PCR. For reverse transcription 2  $\mu\text{g}$  of total RNA isolated from U87-MG cells or A549 cells was used in a reaction volume of 20  $\mu\text{L}$ . One  $\mu\text{l}$  of the cDNA sample was used for a 30 cycle PCR reaction. Predicted fragment sizes are listed in the methods section (representative gel from  $n=3$  experiments).

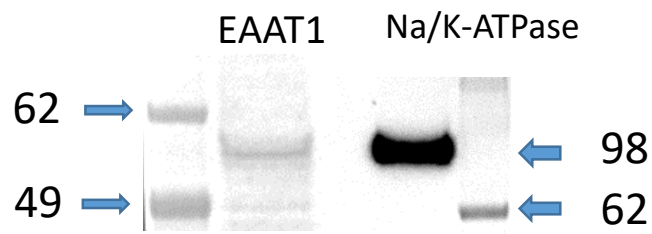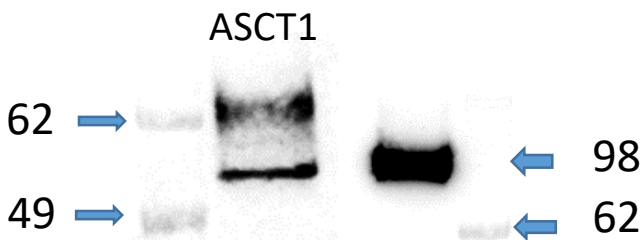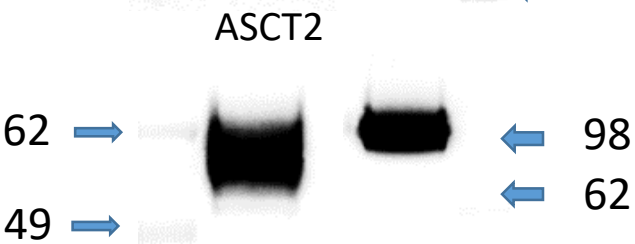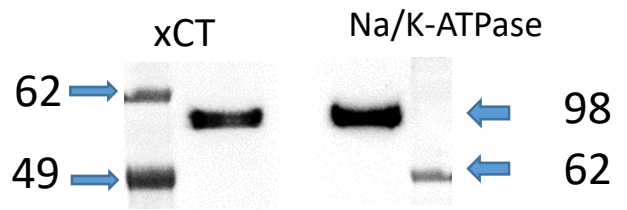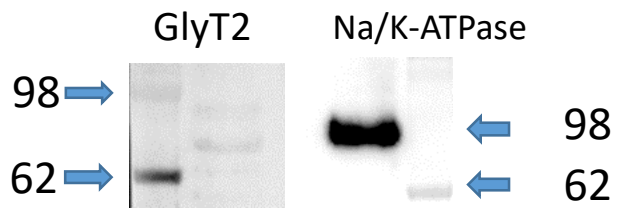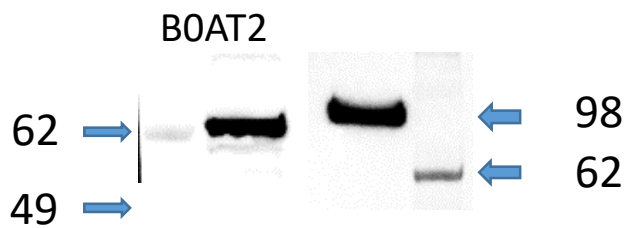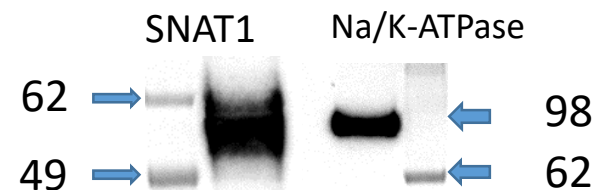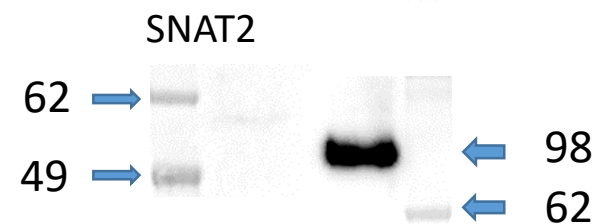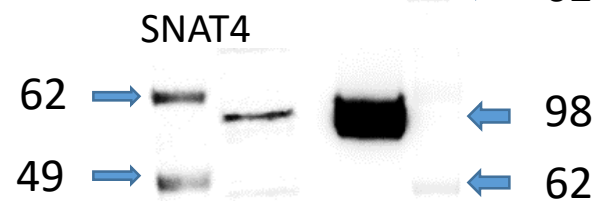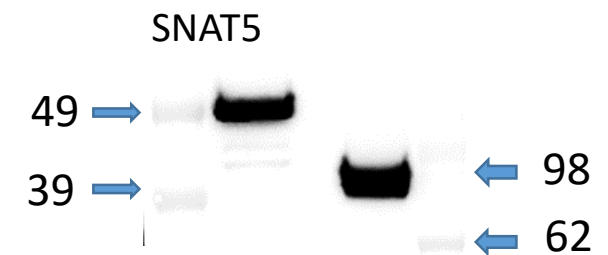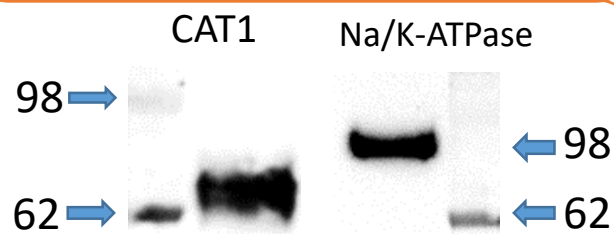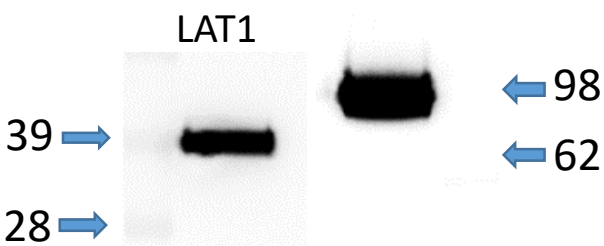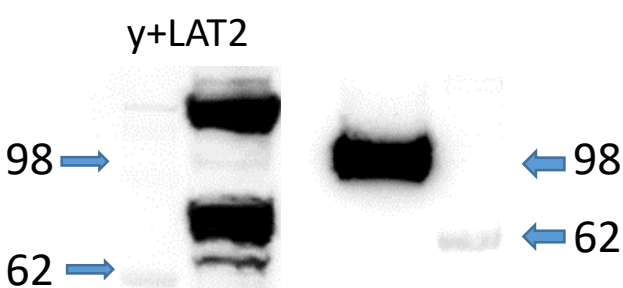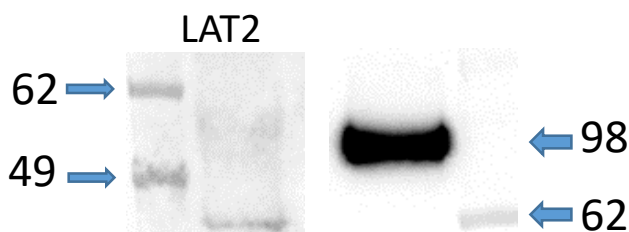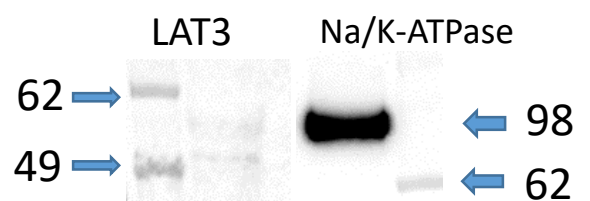

**Fig S3.** Surface expression of amino acid transporters in U87-MG cells. Surface biotinylation was performed before detection of amino acid transporters by western blotting (Representative blot from e=3 experiments). Antibodies were used as listed in table S12. For comparison Na<sup>+</sup>/K<sup>+</sup>-ATPase was detected on the same blot after stripping. Molecular weight of marker proteins is given in kDa.

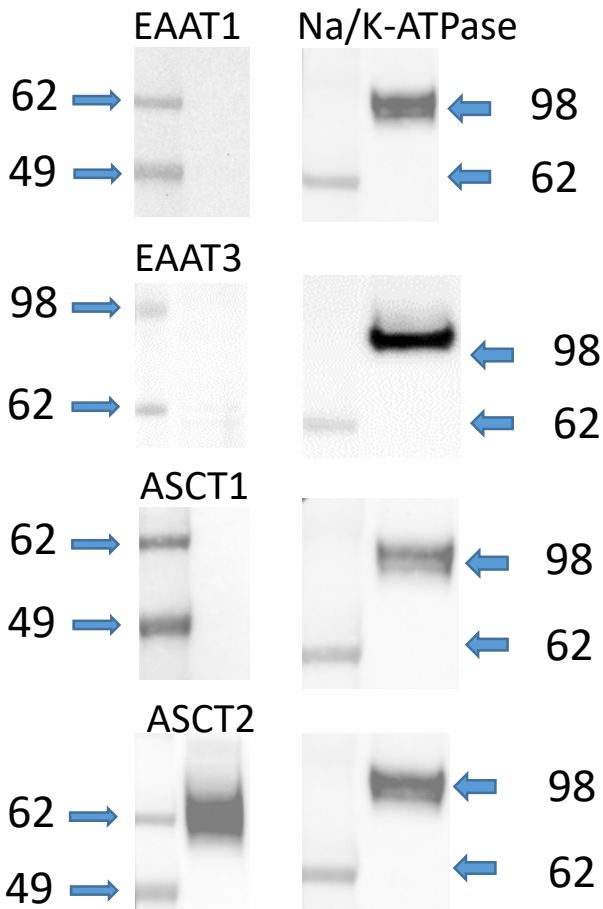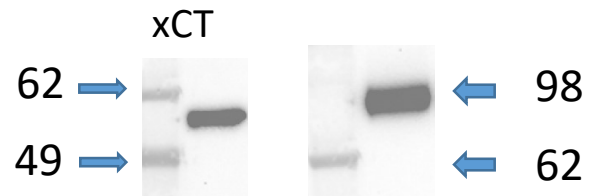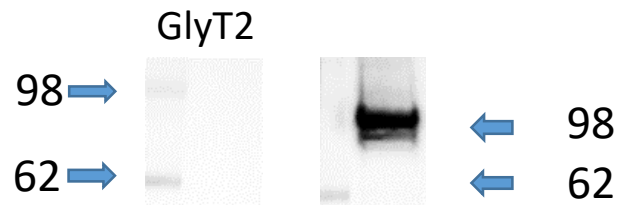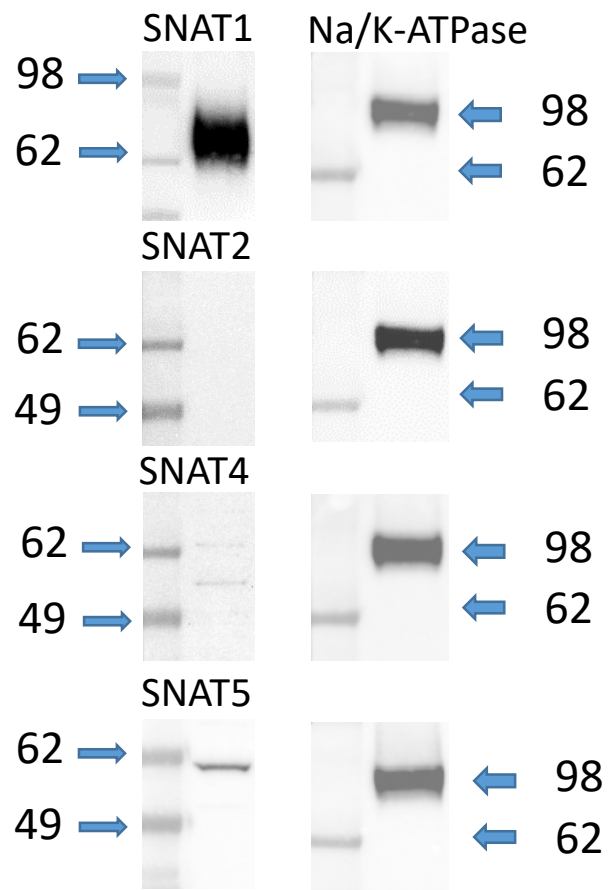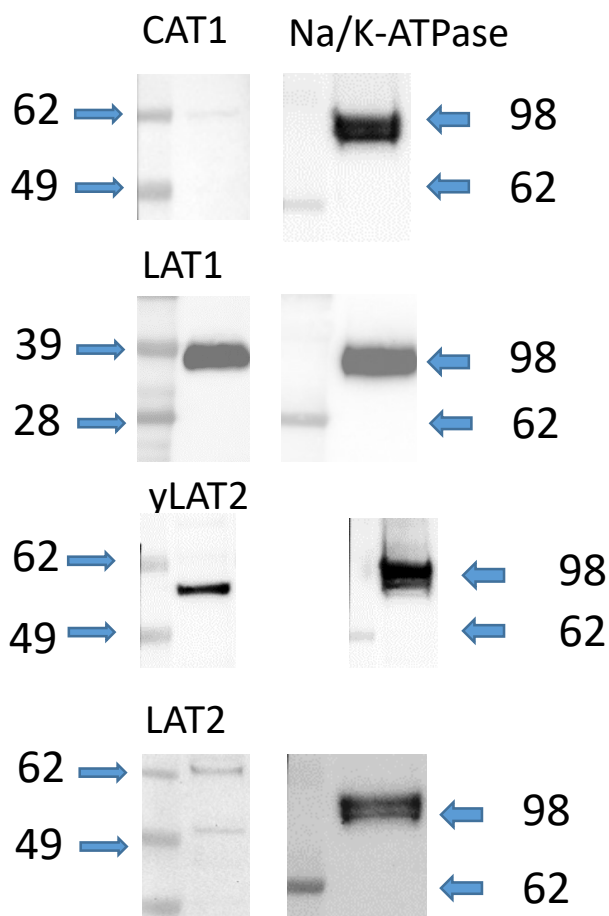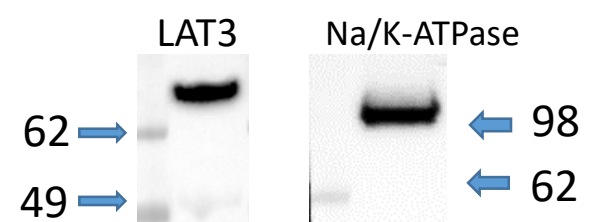



**Fig S4.** Surface expression of amino acid transporters in A549 cells. Surface biotinylation was performed before detection of amino acid transporters by western blotting (Representative blot from e=3 experiments). Antibodies were used as listed in table S12. For comparison Na<sup>+</sup>/K<sup>+</sup>-ATPase was detected on the same blot after stripping. Molecular weight of marker proteins is given in kDa.

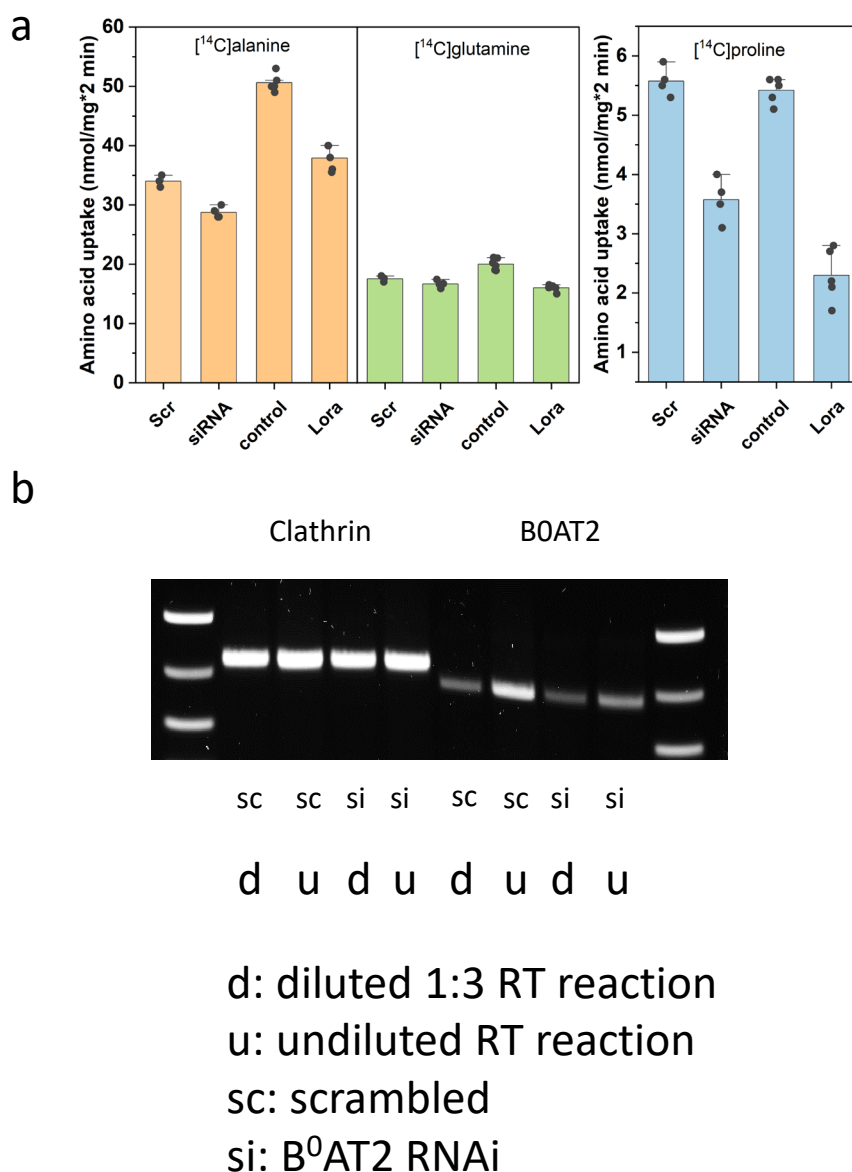

**Fig. S5:** Contribution by B<sup>0</sup>AT2 to amino acid transport in U87-MG cells. (a) Alanine, glutamine and proline transport was measured in control cells and in cells where B<sup>0</sup>AT2 was silenced by RNAi. For comparison, inhibition by the published B<sup>0</sup>AT2 inhibitor loratadine (lora) is shown. Error bars indicate standard deviation. Numbers of biologically independent samples (n) from left to right n=3,4,5,5,3,4,6,6,4,4,5,5; e=3. (b) Silencing of B<sup>0</sup>AT2 mRNA (si), using 1:3 diluted and undiluted reverse transcriptase reactions to amplify B<sup>0</sup>AT2 or clathrin (control) mRNA. Scrambled RNA (sc) was used as a control. Representative gel from e=3 experiments.

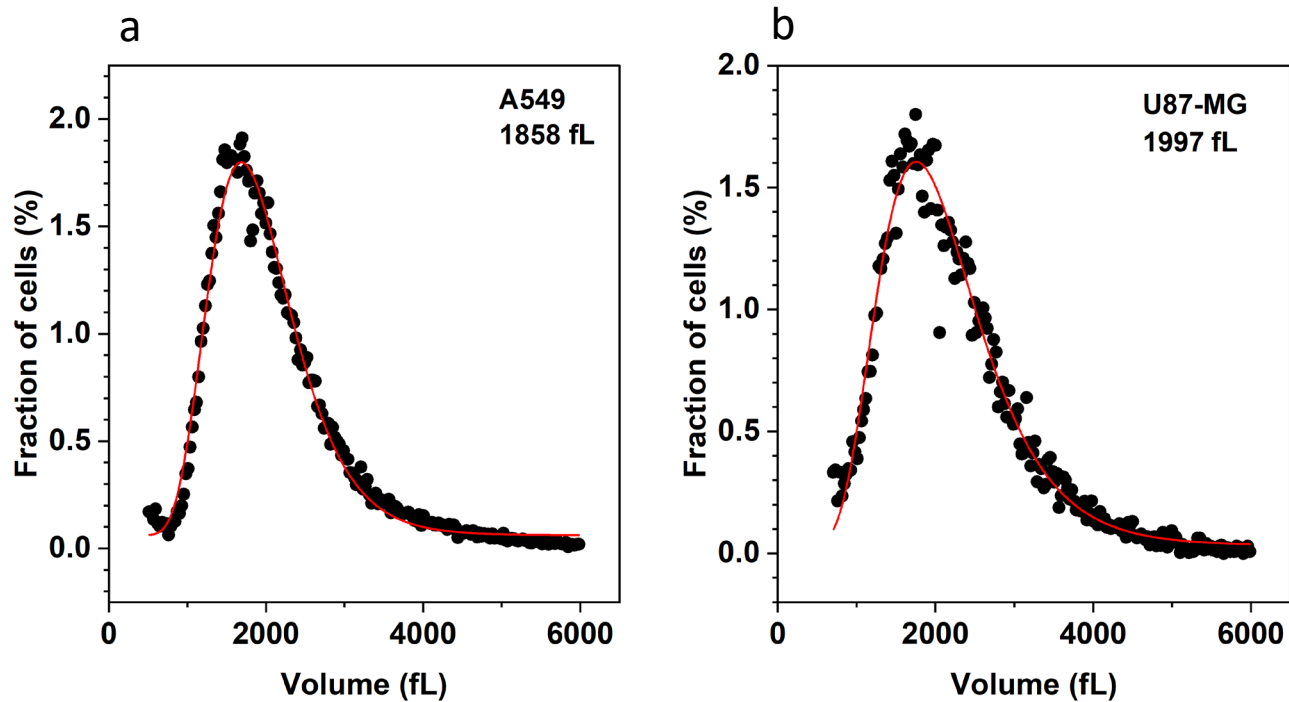

**Fig. S6:** Volume analysis of cell lines. Cell lines A549 (A) and U87-MG (B) were dislodged by trypsin treatment and dispersed by passage through 70  $\mu\text{m}$  sieve. Cell size was measured by a Multisizer 4 Coulter counter.

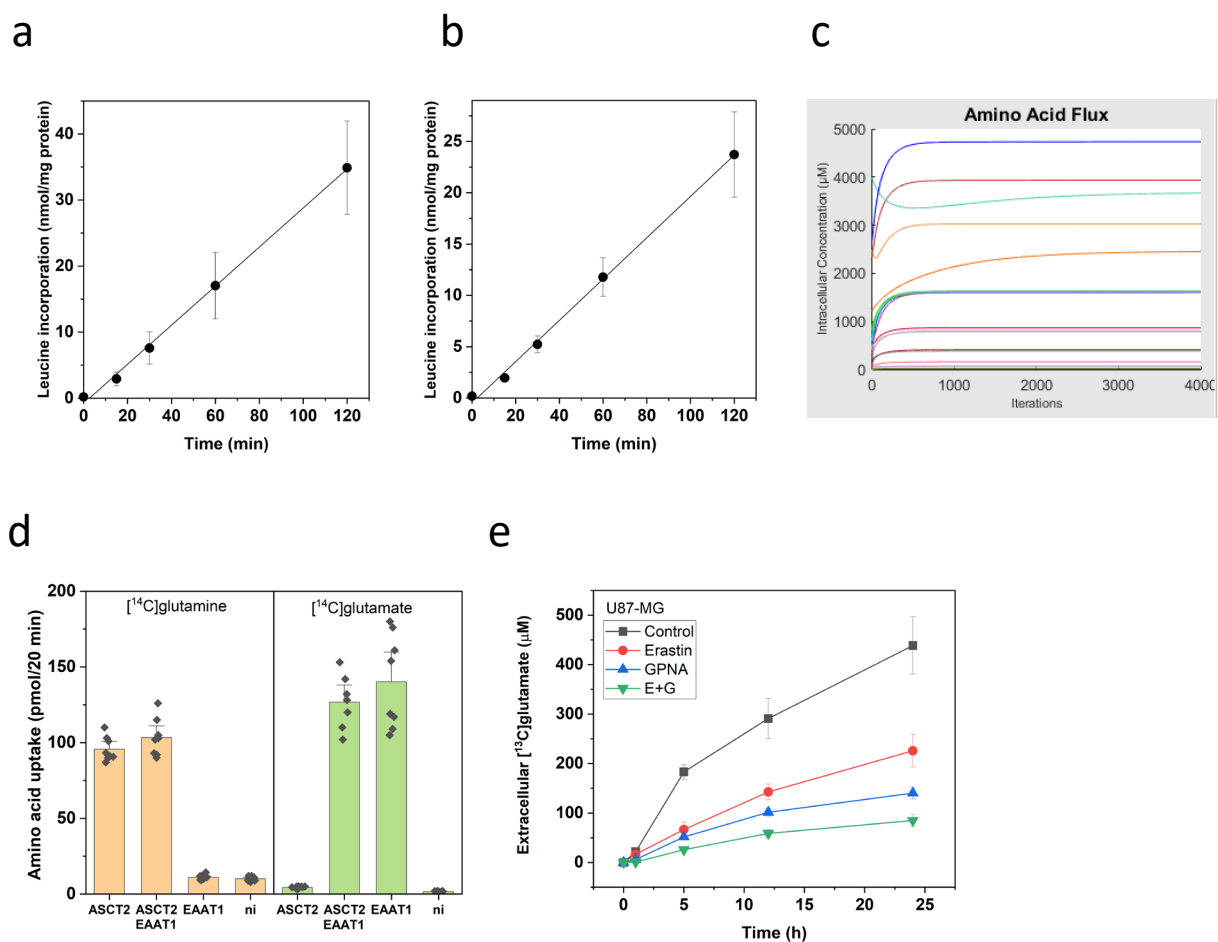

**Fig. S7:** Quantification and verification of modelling parameters. a,b) Incorporation of leucine into protein over time in A549 (a) and U87-MG (b) cells.  $n=3$ ,  $e=3$ . c) Snapshot of JDfC demonstrating a stable equilibrium of cytosolic amino acid concentrations starting from low initial concentrations. d) Activity of transporters in *Xenopus laevis* oocytes was confirmed by uptake of  $100\ \mu\text{M}$   $[^{14}\text{C}]$ glutamate and  $100\ \mu\text{M}$   $[^{14}\text{C}]$ glutamine ( $n=8,8,11,11,11,12,7,8,11$ ;  $e=1$ ). The 95% confidence intervals are shown. e) Efflux of glutamate in U87-MG cells was measured by feeding cells with  $[^{13}\text{C}]$ glutamine in BME medium supplemented with non-essential amino acids and detecting M+5 glutamate in the media over time. To discriminate between glutamate efflux pathways, xCT inhibitor erastin ( $10\ \mu\text{M}$ ) and ASCT2 inhibitor GPNA ( $10\ \text{mM}$ ) were used. Data are shown as mean  $\pm$  STD ( $n=15$ ,  $e=3$ ).

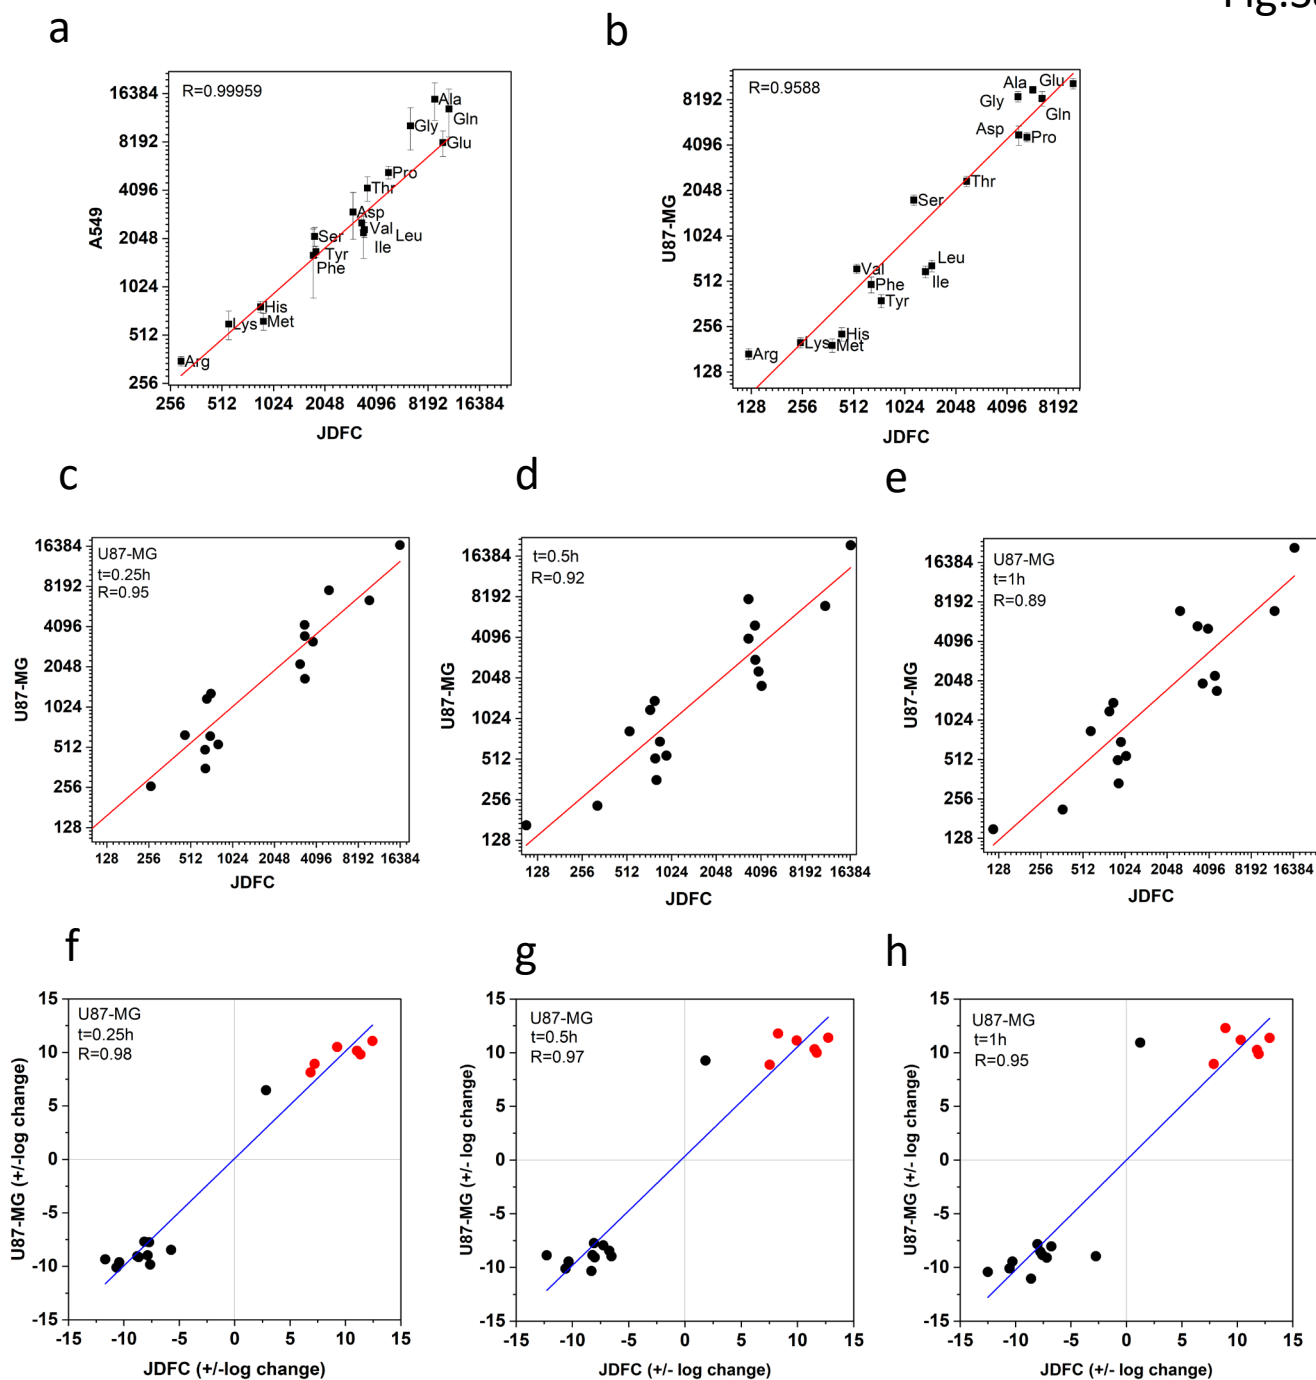

**Fig. S8:** Modelling of amino acid transport. a,b) Correlation between experimental and simulated amino acid concentrations in A549 cells (a) and U87-MG cells (b) Error bars indicate the mean  $\pm$  STD. (c-h) U87-MG cells were incubated with an amino acid mixture of all proteinogenic amino acids (100  $\mu$ M each). Five amino acids were spiked at a concentration of 500  $\mu$ M. Cytosolic amino acid concentrations were determined by LC-MS before addition of amino acid mixtures and after 15, 30 and 60 min. The correlation between experimental data and simulation were analysed using absolute concentrations (c,d,e) and relative changes (log<sub>2</sub> change) for each time point (f,g,h) plotted in a quadrant chart. Spiked amino acids are shown as red dots in panels f, g, h. Mean concentrations of n=3 experiments are shown.

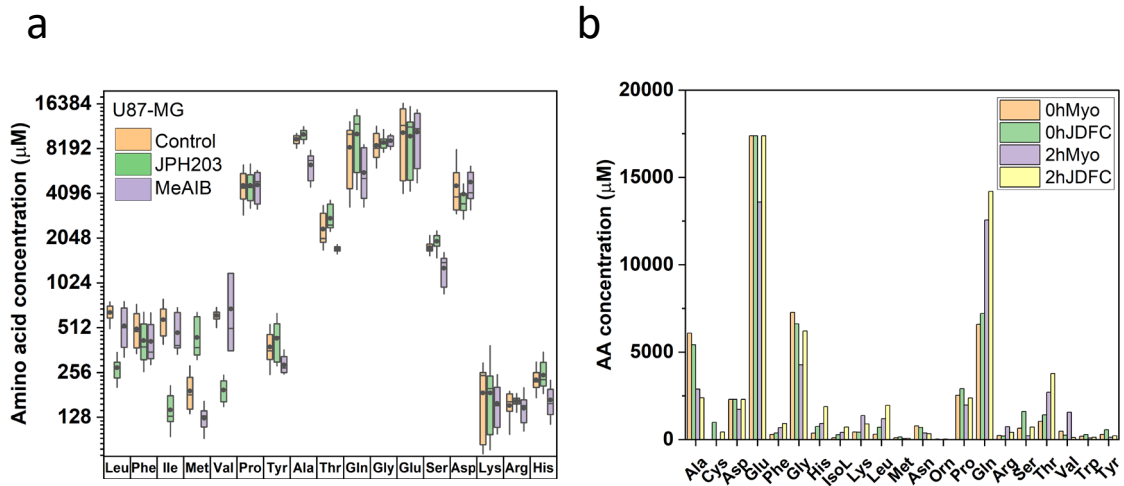

**Fig. S9** Disturbing amino acid homeostasis. a) Effect of amino acid transport inhibitors JPH203 and MeAIB on cytosolic amino acid concentrations in U87-MG cells after 1h incubation (n=15, e=3, data are shown as box-whisker plot showing range, 25-75% area, median and mean. b) Experimental and simulated cytosolic amino acid concentrations in human myotubes grown in sarcopenia-inducing medium after incubation with AXA2678 for 2h. Mean concentration of 2 independent experiments are shown). Sample amino acid concentrations were multiplied x113 based on morphometric volume measurements in parallel experiments..

**Table S1: Experimental conditions to isolate amino acid transport activities.**

| Transport Substrate                  | Ion  | Inhibitor/competitor (conc.)           | Detectable Transporters                                                                        |
|--------------------------------------|------|----------------------------------------|------------------------------------------------------------------------------------------------|
| Arginine.<br>100 µM.<br>6 minutes.   | Na+  | None                                   | ATB <sup>0+</sup> / CAT1,2,3 / y+LAT1,2 / b <sup>0+</sup> AT                                   |
|                                      | Na+  | Me-DL-Trp (2.5 mM, ATB <sup>0+</sup> ) | / CAT1,2,3 / y+LAT1,2 / b <sup>0+</sup> AT                                                     |
|                                      | Na+  | NEM (0.4 mM pre-treated)               | ATB <sup>0+</sup> / / y+LAT1,2 / b <sup>0+</sup> AT                                            |
|                                      | Na+  | Leucine (1 mM)                         | / CAT1,2,3 / /                                                                                 |
|                                      | NMDG | Leucine (1 mM)                         | / CAT1,2,3 / y+LAT1,2 /                                                                        |
|                                      | Na+  | Arginine (10 mM)                       | None                                                                                           |
| Glutamate<br>25 µM.<br>6 minutes.    | Na+  | None                                   | EAAT1,2,3,4,5 / xCT                                                                            |
|                                      | NMDG | None                                   | / xCT                                                                                          |
|                                      | Na+  | Cysteine (10 mM)                       | EAAT1,2, ,4,5 / xCT                                                                            |
|                                      | Na+  | Dihydrokainate (200 µM, EAAT2)         | EAAT1, ,3,4,5 / xCT                                                                            |
|                                      | Na+  | UCPH101 (10 µM, EAAT1)                 | EAAT ,2,3,4,5 / xCT                                                                            |
|                                      | Na+  | TBOA (0.1 mM and 0.5 mM)               | / xCT                                                                                          |
|                                      | Na+  | Sulfasalazine (0.5 mM, xCT)            | EAAT1,2,3,4,5 /                                                                                |
|                                      | Na+  | Erastin (10 µM)                        | EAAT1,2,3,4,5 /                                                                                |
| Leucine<br>100 µM.<br>2 minutes.     | Na+  | None                                   | ATB <sup>0+</sup> / B <sup>0</sup> AT1,2,NTT4 / LAT1,2,3,4 / y+LAT1,2 / SNAT2                  |
|                                      | NMDG | None                                   | / LAT1,2,3,4 /                                                                                 |
|                                      | Na+  | Me-DL-Trp (2.5mM, ATB <sup>0+</sup> )  | / B <sup>0</sup> AT1,2,NTT4 / LAT1,2,3,4 / y+LAT1,2 / SNAT2                                    |
|                                      | Na+  | Cinromide (30 µM, B <sup>0</sup> AT1)  | ATB <sup>0+</sup> / B <sup>0</sup> AT ,2,NTT4 / LAT1,2,3,4 / y+LAT1,2 / SNAT2                  |
|                                      | Na+  | Loratadine (50 µM, B <sup>0</sup> AT2) | ATB <sup>0+</sup> / B <sup>0</sup> AT1 ,NTT4 / LAT1,2,3,4 / y+LAT1,2 / SNAT2                   |
|                                      | Na+  | BCH (10 mM)                            | / NTT4 / / y+LAT1,2 / SNAT2                                                                    |
|                                      | Na+  | JPH203 (3 µM, LAT1)                    | ATB <sup>0+</sup> / B <sup>0</sup> AT1,2,NTT4 / LAT ,2,3,4 / y+LAT1,2 / SNAT2                  |
|                                      | Na+  | Arginine (1 mM)                        | / B <sup>0</sup> AT1,2,NTT4 / LAT1,2,3,4 / / SNAT2                                             |
|                                      | Na+  | MeAIB (10 mM)                          | ATB <sup>0+</sup> / B <sup>0</sup> AT1,2,NTT4 / LAT1,2,3,4 / y+LAT1,2 /                        |
| Phenylalanine<br>100 µM<br>2 minutes | Na+  | None                                   | ATB <sup>0+</sup> / B <sup>0</sup> AT1 / LAT1,2,3,4 / y+LAT1,2 / TAT1                          |
|                                      | NMDG | None                                   | / LAT1,2,3,4 / / TAT1                                                                          |
|                                      | Na+  | NEM (0.4 mM pretreated)                | ATB <sup>0+</sup> / B <sup>0</sup> AT1 / LAT1,2, / y+LAT1,2 / TAT1                             |
|                                      | Na+  | Me-DL-Trp (2.5 mM, ATB <sup>0+</sup> ) | / B <sup>0</sup> AT1 / LAT1,2,3,4 / y+LAT1,2 / TAT1                                            |
|                                      | Na+  | Cinromide (3 µM, B <sup>0</sup> AT1)   | ATB <sup>0+</sup> / / LAT1,2,3,4 / y+LAT1,2 / TAT1                                             |
|                                      | Na+  | JPH203 (3 µM, LAT1)                    | ATB <sup>0+</sup> / B <sup>0</sup> AT1/ LAT ,2,3,4 / y+LAT1,2 / TAT1                           |
|                                      | Na+  | Arginine (1 mM)                        | / B <sup>0</sup> AT1/ LAT1,2,3,4 / / TAT1                                                      |
|                                      | NMDG | BCH (10 mM)                            | ATB <sup>0+</sup> / B <sup>0</sup> AT1/ / y+LAT1,2 / TAT1                                      |
| Alanine<br>300 µM<br>2 minutes       | Na+  | None                                   | ASCT1,2 / ATB <sup>0+</sup> / B <sup>0</sup> AT1,2 / asc-1 / LAT2 / PAT1,2 / SNAT1,2,4,5       |
|                                      | NMDG | None                                   | / / / asc-1 / LAT2 / PAT1,2 /                                                                  |
|                                      | Na+  | GPNA (3 mM)                            | ASCT1, / / B <sup>0</sup> AT1,2 / asc-1 / LAT2 / PAT1,2 / SNAT ,4,5                            |
|                                      | Na+  | Me-DL-Trp (2.5 mM, ATB <sup>0+</sup> ) | ASCT1,2 / / B <sup>0</sup> AT1,2 / asc-1 / LAT2 / PAT1,2 / SNAT1,2,4,5                         |
|                                      | Na+  | Cinromide (3 µM, B <sup>0</sup> AT1)   | ASCT1,2 / ATB <sup>0+</sup> / B <sup>0</sup> AT ,2 / asc-1 / LAT2 / PAT1,2 / SNAT1,2,4,5       |
|                                      | Na+  | BMS-466442 (2uM, asc-1)                | ASCT1,2 / ATB <sup>0+</sup> / B <sup>0</sup> AT1,2 / / LAT2 / PAT1,2 / SNAT1,2,4,5             |
|                                      | Na+  | Loratadine (50 µM)                     | ASCT1,2 / ATB <sup>0+</sup> / B <sup>0</sup> AT1 / asc-1 / LAT2 / PAT1,2 / SNAT1,2,4,5         |
|                                      | NMDG | BCH (10 mM)                            | ASCT1,2/ / / asc-1 / / PAT1,2 / SNAT1,2,4,5                                                    |
|                                      | Na+  | MeAIB (10 mM)                          | ASCT1,2 / ATB <sup>0+</sup> / B <sup>0</sup> AT1,2 / asc-1 / LAT2 / / SNAT 5                   |
|                                      | Na+  | GABA (10 mM)                           | ASCT1,2 / ATB <sup>0+</sup> / B <sup>0</sup> AT1,2 / asc-1 / LAT2 / PAT ,2 / SNAT1,2,4,5       |
|                                      | Na+  | Betaine (10 mM)                        | ASCT1,2 / ATB <sup>0+</sup> / B <sup>0</sup> AT1,2 / asc-1 / LAT2 / PAT1,2 / SNAT1, ,4,5       |
|                                      | Na+  | Alanine (30 mM)                        | None                                                                                           |
| Glutamine<br>100 µM<br>2 minutes.    | Na+  | None                                   | ASCT2 / ATB <sup>0+</sup> / B <sup>0</sup> AT1,2 / LAT1,2 / y+LAT1,2/ SNAT1,2,3,4,5            |
|                                      | NMDG | None                                   | / / / LAT1,2 / /                                                                               |
|                                      | Na+  | Me-DL-Trp (2.5 mM, ATB <sup>0+</sup> ) | ASCT2 / / B <sup>0</sup> AT1 / LAT1,2 / y+LAT1,2/ SNAT1,2,3,4,5                                |
|                                      | Na+  | Cinromide (3 µM, B <sup>0</sup> AT1)   | ASCT2 / ATB <sup>0+</sup> / / LAT1,2 / y+LAT1,2/ SNAT1,2,3,4,5                                 |
|                                      | Na+  | JPH203 (3 µM, LAT1)                    | ASCT2 / ATB <sup>0+</sup> / B <sup>0</sup> AT1 / LAT ,2 / y+LAT1,2/ SNAT1,2,3,4,5              |
|                                      | Na+  | BCH (10 mM)                            | ASCT2 / ATB <sup>0+</sup> / / / y+LAT1,2/ SNAT1,2,3,4,5                                        |
|                                      | Na+  | Arginine (10 mM)                       | ASCT2 / / B <sup>0</sup> AT1 / LAT1,2 / / SNAT1,2,3, ,5                                        |
|                                      | Li+  | None                                   | / / / LAT1,2 / y+LAT1,2/ SNAT 3, ,5                                                            |
|                                      | Na+  | MeAIB (10 mM)                          | ASCT2/ ATB <sup>0+</sup> / B <sup>0</sup> AT1 / LAT1,2 / y+LAT1,2/ SNAT ,3, ,5                 |
|                                      | Na+  | Betaine (10 mM)                        | ASCT2 / ATB <sup>0+</sup> / B <sup>0</sup> AT1 /LAT1,2 / y+LAT1,2/ SNAT1, ,3,4,5               |
|                                      | NMDG | BCH (10mM)                             | ASCT2 / ATB <sup>0+</sup> / B <sup>0</sup> AT1 / / y+LAT1,2/ SNAT1,2,3,4,5                     |
| Glycine<br>100 µM<br>6 minutes.      | Na+  | None                                   | ASCT2/ GlyT1,2 / ATB <sup>0+</sup> / B <sup>0</sup> AT1 / asc-1 / LAT2 / PAT1,2 / SNAT1,2,4,5  |
|                                      | NMDG | None                                   | / / / / asc-1 / LAT2 / PAT1,2 /                                                                |
|                                      | Na+  | ALX5407(1 µM, GlyT1)                   | ASCT2 / GlyT ,2 / ATB <sup>0+</sup> / B <sup>0</sup> AT1 / asc-1 / LAT2 / PAT1,2 / SNAT1,2,4,5 |
|                                      | Na+  | ORG25543 (0.2 µM, GlyT2)               | ASCT2/ GlyT1, / ATB <sup>0+</sup> / B <sup>0</sup> AT1 / asc-1 / LAT2 / PAT1,2 / SNAT1,2,4,5   |
|                                      | Na+  | Me-DL-Trp (2.5 mM, ATB <sup>0+</sup> ) | ASCT2/ GlyT1,2 / / B <sup>0</sup> AT1 / asc-1 / LAT2 / PAT1,2 / SNAT1,2,4,5                    |
|                                      | Na+  | Cinromide (3 µM, B <sup>0</sup> AT1)   | ASCT2/ GlyT1,2 / ATB <sup>0+</sup> / / asc-1 / LAT2 / PAT1,2 / SNAT1,2,4,5                     |
|                                      | Na+  | BMS-466442 (2 µM, asc-1)               | ASCT2/ GlyT1,2 / ATB <sup>0+</sup> / B <sup>0</sup> AT1 / / LAT2 / PAT1,2 / SNAT1,2,4,5        |
|                                      | NMDG | BCH (10 mM)                            | ASCT2/ GlyT1,2 / / / asc-1 / / PAT1,2 / SNAT1,2,4,5                                            |
|                                      | Na+  | MeAIB (10 mM)                          | ASCT2 / GlyT1,2 / ATB <sup>0+</sup> / B <sup>0</sup> AT1 / asc-1 / LAT2 / / SNAT 5             |
|                                      | Na+  | GABA (15 mM)                           | ASCT2/ GlyT1,2 / ATB <sup>0+</sup> / B <sup>0</sup> AT1 / asc-1 / LAT2 / PAT ,2 / SNAT1,2,4,5  |
|                                      | Na+  | Betaine (10 mM)                        | ASCT2/ GlyT1,2 / ATB <sup>0+</sup> / B <sup>0</sup> AT1 / asc-1 / LAT2 / PAT1,2 / SNAT1, ,4,5  |
|                                      | Na+  | Glycine (30 mM)                        | None                                                                                           |
| Proline                              | Na+  | None                                   | ASCT1 / PROT / B <sup>0</sup> AT1,2 / SIT / asc-1 / PAT1,2,4 / SNAT1,2,4,5                     |

|                           |      |                                             |                                                                                 |
|---------------------------|------|---------------------------------------------|---------------------------------------------------------------------------------|
| 100 $\mu$ M<br>6 minutes. | NMDG | None                                        | / / / /PAT1,2,4/                                                                |
|                           | Na+  | LP-403812 (10 $\mu$ M, PROT)                | ASCT1 / /B <sup>0</sup> AT1,2 / SIT / PAT1,2,4 / SNAT1,2,4,5                    |
|                           | Na+  | Cinromide (3 $\mu$ M, B <sup>0</sup> AT1)   | ASCT1 / PROT / B <sup>0</sup> AT <sub>2</sub> / SIT / PAT1,2,4 / SNAT1,2,4,5    |
|                           | Na+  | Loratadine (50 $\mu$ M, B <sup>0</sup> AT2) | ASCT1 / PROT / B <sup>0</sup> AT1 <sub>1</sub> / SIT / PAT1,2,4 / SNAT1,2,4,5   |
|                           | Na+  | Tryptophan (1 mM)                           | ASCT1 / PROT / B <sup>0</sup> AT1,2 / SIT / PAT1,2 <sub>1</sub> / SNAT1,2,4,5   |
|                           | Na+  | L-trans-4-hydroxyproline (200 $\mu$ M)      | / PROT / B <sup>0</sup> AT1,2 / SIT / PAT1,2,4 / SNAT1,2,4,5                    |
|                           | Na+  | GABA (15 mM)                                | ASCT1 / PROT / B <sup>0</sup> AT1,2 / SIT / PAT <sub>2,4</sub> / SNAT1,2,4,5    |
|                           | Na+  | MeAIB (10 mM)                               | ASCT1 / PROT / B <sup>0</sup> AT1,2 / /PAT <sub>2,4</sub> / SNAT <sub>2,5</sub> |
|                           | Na+  | Proline (30 mM)                             | None                                                                            |

**Table S2: Amino acid transporters and their mechanisms.** Transporters are listed by solute carrier family number and common name. The corresponding transport activity in cultured cells is shown in column “Activity”. Substrates are shown in one-letter code or as groups with AA<sup>0</sup> indicating neutral amino acids, AA<sup>+</sup> indicating cationic amino acids, O, ornithine, Cit, citrulline, Cn, cysteine. S: symport, A: antiport, subcellular location is shown as PM, plasma membrane; V, vesicular; M, mitochondria; Ly, lysosome.

| SLC             | Acronym                   | Substrates                            | Activity                        | Mechanism                                              | Loc  |
|-----------------|---------------------------|---------------------------------------|---------------------------------|--------------------------------------------------------|------|
| <i>SLC1A1</i>   | EAAT3                     | D,E                                   | System X <sub>AG</sub>          | S:3Na <sup>+</sup> /1H <sup>+</sup> :A:1K <sup>+</sup> | PM   |
| <i>SLC1A2</i>   | EAAT2                     | D,E                                   | System X <sub>AG</sub>          | S:3Na <sup>+</sup> /1H <sup>+</sup> :A:1K <sup>+</sup> | PM   |
| <i>SLC1A3</i>   | EAAT1                     | D,E                                   | System X <sub>AG</sub>          | S:3Na <sup>+</sup> /1H <sup>+</sup> :A:1K <sup>+</sup> | PM   |
| <i>SLC1A4</i>   | ASCT1                     | A,S,C                                 | System ASC                      | Antiporter                                             | PM   |
| <i>SLC1A5</i>   | ASCT2                     | A,S,C,T,Q,N                           | System ASC                      | Antiporter                                             | PM   |
| <i>SLC1A6</i>   | EAAT4                     | D,E                                   | System X <sub>AG</sub>          | S:3Na <sup>+</sup> /1H <sup>+</sup> :A:1K <sup>+</sup> | PM   |
| <i>SLC1A7</i>   | EAAT5                     | D,E                                   | System X <sub>AG</sub>          | S:3Na <sup>+</sup> /1H <sup>+</sup> :A:1K <sup>+</sup> | PM   |
| <i>SLC3A1</i>   | rBAT                      | Trafficking                           | Heavy chains of                 |                                                        | PM   |
| <i>SLC3A2</i>   | 4F2hc                     | subunits                              | Heteromeric AA                  |                                                        | PM   |
| <i>SLC6A5</i>   | GlyT2                     | G                                     | System Gly                      | S:3Na <sup>+</sup> /1Cl <sup>-</sup>                   | PM   |
| <i>SLC6A7</i>   | PROT                      | P                                     | Proline transporter             | S:2Na <sup>+</sup> /1Cl <sup>-</sup>                   | V/PM |
| <i>SLC6A9</i>   | GlyT1                     | G                                     | System Gly                      | S:2Na <sup>+</sup> /1Cl <sup>-</sup>                   | PM   |
| <i>SLC6A14</i>  | ATB <sup>0,+</sup>        | All AA <sup>0</sup> , AA <sup>+</sup> | System B <sup>0,+</sup>         | S:2Na <sup>+</sup> /1Cl <sup>-</sup>                   | PM   |
| <i>SLC6A15</i>  | B <sup>0</sup> AT2        | P,L,V,I,M                             | SystemB <sup>0</sup>            | S:1Na <sup>+</sup>                                     | PM   |
| <i>SLC6A17</i>  | NTT4/B <sup>0</sup> AT3   | L,M,P,C,A,Q,S,H,G                     | SystemB <sup>0</sup>            | S:2Na <sup>+</sup> /1Cl <sup>-</sup>                   | PM/V |
| <i>SLC6A18</i>  | XT2/B <sup>0</sup> AT3    | G,A                                   | System Gly                      | S:2Na <sup>+</sup> /1Cl <sup>-</sup>                   | PM   |
| <i>SLC6A19</i>  | B <sup>0</sup> AT1        | All AA <sup>0</sup>                   | System B <sup>0</sup>           | S:1Na <sup>+</sup>                                     | PM   |
| <i>SLC6A20</i>  | SIT1                      | P (F,L)                               | System IMINO                    | S:2Na <sup>+</sup> /1Cl <sup>-</sup>                   | PM   |
| <i>SLC7A1</i>   | CAT-1                     | K,R,O                                 | System y <sup>+</sup>           | Uniporter                                              | PM   |
| <i>SLC7A2</i>   | CAT-2                     | K,R,O                                 | System y <sup>+</sup>           | Uniporter                                              | PM   |
| <i>SLC7A3</i>   | CAT-3                     | K,R,O                                 | System y <sup>+</sup>           | Uniporter                                              | PM   |
| <i>SLC7A4</i>   | CAT-4                     | unknown                               | unknown                         | unknown                                                | Ly   |
| <i>SLC7A5</i>   | LAT1/4F2hc                | H,M,L,I,V,F,Y,W                       | System L                        | Antiporter                                             | PM   |
| <i>SLC7A6</i>   | y <sup>+</sup> LAT2/4F2hc | K,R,Q,H,M,L                           | System y <sup>+</sup> L         | S:AA <sup>0</sup> -Na <sup>+</sup> :A:AA <sup>+</sup>  | PM   |
| <i>SLC7A7</i>   | y <sup>+</sup> LAT1/4F2hc | K,R,Q,H,M,L,A,C                       | System y <sup>+</sup> L         | S:AA <sup>0</sup> -Na <sup>+</sup> :A:AA <sup>+</sup>  | PM   |
| <i>SLC7A8</i>   | LAT2/4F2hc                | All AA <sup>0</sup> (-P)              | System L                        | Antiporter                                             | PM   |
| <i>SLC7A9</i>   | b <sup>0,+</sup> AT/rBAT  | R,K,O,Cn                              | System b <sup>0,+</sup>         | Antiporter                                             | PM   |
| <i>SLC7A10</i>  | Asc-1/4F2hc               | G,A,S,C,T                             | System asc                      | Antiporter                                             | PM   |
| <i>SLC7A11</i>  | xCT/4F2hc                 | E,Cn                                  | Sytem x <sub>c</sub>            | Antiporter                                             | PM   |
| <i>SLC7A12</i>  | Asc-2                     | G,A,S,C,T                             | System asc                      | Antiporter                                             | PM   |
| <i>SLC7A13</i>  | AGT1/rBAT                 | Cn                                    | Cystine transporter             | Antiporter                                             | PM   |
| <i>SLC7A14</i>  |                           | K,R,O                                 | System c                        | Uniporter                                              | Ly   |
| <i>SLC16A10</i> | TAT1                      | W,Y,F                                 | System T                        | Uniporter                                              | PM   |
| <i>SLC17A6</i>  | VGLUT2                    | E                                     | Vesicular glutamate transporter | Uniporter                                              | V    |
| <i>SLC17A7</i>  | VGLUT1                    | E                                     | Vesicular glutamate transporter | Uniporter                                              | V    |
| <i>SLC17A8</i>  | VGLUT3                    | E                                     | Vesicular glutamate transporter | Uniporter                                              | V    |
| <i>SLC25A2</i>  | ORC2                      | K,R,H,O,Cit                           | Orn/Cit carrier                 | Antiporter                                             | M    |
| <i>SLC25A12</i> | AGC1                      | D,E                                   | Asp/Glu carrier                 | Antiporter                                             | M    |
| <i>SLC25A13</i> | AGC2                      | D,E                                   | Asp/Glu carrier                 | Antiporter                                             | M    |
| <i>SLC25A15</i> | ORC1                      | K,R,H,O,Cit                           | Orn/Cit carrier                 | Antiporter                                             | M    |
| <i>SLC25A18</i> | GC2                       | E                                     | Glu carrier                     | A:OH-                                                  | M    |
| <i>SLC25A22</i> | GC1                       | E                                     | Glu carrier                     | A:OH-                                                  | M    |
| <i>SLC32A1</i>  | VIAAT                     | G,GABA                                | Vesicular Gly/GABA transporter  | A:H <sup>+</sup>                                       | V    |



|                 |        |                   |                               |           |       |
|-----------------|--------|-------------------|-------------------------------|-----------|-------|
| <i>SLC36A1</i>  | PAT1   | G,P,A             | Proton-amino acid transporter | S:H+      | PM,Ly |
| <i>SLC36A2</i>  | PAT2   | G,P,A             | Proton-amino acid transporter | S:H+      | PM    |
| <i>SLC36A3</i>  | PAT3   | unknown           | unknown                       | unknown   | PM    |
| <i>SLC36A4</i>  | PAT4   | P,W               | Amino acid sensor             | unknown   | PM,L  |
| <i>SLC38A1</i>  | SNAT1  | G,A,N,C,Q,H,M     | System A                      | S:Na+     | PM    |
| <i>SLC38A2</i>  | SNAT2  | G,P,A,S,C,Q,N,H,M | System A                      | S:Na+     | PM    |
| <i>SLC38A3</i>  | SNAT3  | Q,N,H             | System N                      | S:Na+A:H+ | PM    |
| <i>SLC38A4</i>  | SNAT4  | G,A,S,C,Q,N,M     | System A                      | S:Na+     | PM    |
| <i>SLC38A5</i>  | SNAT5  | Q,N,H,A           | System N                      | S:Na+A:H+ | PM    |
| <i>SLC38A6</i>  | SNAT6  | Unknown           | Unknown                       | unknown   |       |
| <i>SLC38A7</i>  | SNAT7  | Q,N,H,A,S,D       | Unknown                       | S:Na+     | Ly    |
| <i>SLC38A8</i>  | SNAT8  | Q,A,R,H,D         | System A                      | S:Na+     | PM    |
| <i>SLC38A9</i>  | SNAT9  | Q,R,N             | Lysosomal transporter         | S:Na+     | Ly    |
| <i>SLC38A10</i> | SNAT10 | Unknown           | Unknown                       | Unknown   |       |
| <i>SLC38A11</i> | SNAT11 | Unknown           | Unknown                       | Unknown   |       |
| <i>SLC43A1</i>  | LAT3   | L,I,M,F,V         | System L                      | Uniporter | PM    |
| <i>SLC43A2</i>  | LAT4   | L,I,M,F,V         | System L                      | Uniporter | PM    |

**Table S3: Substrate  $K_M$ -Values of known amino acid transporters.** The table shows a curated list of  $K_M$ -values, which in the opinion of the authors represent the most reliable experimental values. Many studies have not determined the  $K_M$  of all possible substrates, in which case an estimate (est) was made based on physical relation to known substrate  $K_M$ -values and general trends of  $K_M$ -values and competitive inhibition observed for a particular transporter. All  $K_M$ -values are shown in  $\mu M$ .

|                              |                                  |
|------------------------------|----------------------------------|
| <b>SLC1 family</b>           |                                  |
| <b><i>SLC1A1</i> (EAAT3)</b> | 1, 2, 3, 4                       |
| Glutamate                    | 62±8                             |
| Aspartate                    | 24±2                             |
| Na                           | 30000 (n=3)                      |
| K                            | 4000                             |
| H                            | 0.003 (est Watzke et al., 2000)  |
| <b><i>SLC1A2</i> (EAAT2)</b> | 1                                |
| Glutamate                    | 97±4                             |
| Aspartate                    | 7±1                              |
| Na                           | 30000 (n=3)                      |
| K                            | 4000 (est equal SLC1A1)          |
| H                            | 0.003 (est)                      |
| <b><i>SLC1A3</i> (EAAT1)</b> | 1                                |
| Glutamate                    | 48±10                            |
| Aspartate                    | 16±1                             |
| Na                           | 41000 (n=3)                      |
| K                            | 4000 (est equal SLC1A1)          |
| H                            | 0.03 (est)                       |
| <b><i>SLC1A4</i> (ASCT1)</b> | 5                                |
| Proline                      | 672±185                          |
| Alanine                      | 71±14                            |
| Serine                       | 88±11                            |
| Cysteine                     | 29±6                             |
| Threonine                    | 137±19                           |
| Valine                       | 390±8                            |
| Na                           | 16000                            |
| <b><i>SLC1A5</i> (ASCT2)</b> | 6                                |
| Asymmetry of $K_M$           | $K_{Mi}/K_{Mo}=100$ <sup>7</sup> |
| Alanine                      | 18.4                             |
| Serine                       | 18.6                             |
| Threonine                    | 20.5                             |
| Cysteine                     | 18.8                             |
| Glutamine                    | 23.8                             |
| Methionine                   | 288                              |

|                       |                          |
|-----------------------|--------------------------|
| Glycine               | 361                      |
| Leucine               | 367                      |
| Valine                | 522                      |
| Glutamate             | 1630                     |
| Na                    | 5700                     |
| <b>SLC1A6 (EAAT4)</b> | <sup>8</sup>             |
| Glutamate             | 2.5±0.9                  |
| Aspartate             | 1±0.3                    |
| Na                    | 30000 (est equal SLC1A1) |
| K                     | 4000 (est equal SLC1A1)  |
| H                     | 0.03 (est)               |
| <b>SLC1A7 (EAAT5)</b> | <sup>9</sup>             |
| Glutamate             | 64±6                     |
| Aspartate             | 13±5                     |
| Na                    | 30000 (est equal SLC1A1) |
| K                     | 4000 (est equal SLC1A1)  |
| H                     | 0.03 (est)               |

|                                    |                              |
|------------------------------------|------------------------------|
| <b>SLC6 family</b>                 |                              |
| <b>SLC6A5 GlyT2</b>                | <sup>10, 11</sup>            |
| Glycine                            | 17                           |
| Na                                 | 82000 (n=3)                  |
| Cl                                 | 48500                        |
| <b>SLC6A6 (TAUT)</b>               | <sup>12</sup>                |
| Taurine                            | 5                            |
| Na                                 | 80000 (n=2)                  |
| Cl                                 | 30000                        |
| <b>SLC6A7 (PROT)</b>               | <sup>13</sup>                |
| Proline                            | 6.2                          |
| Na                                 | 80000 (n=2) (est equal TauT) |
| Cl                                 | 30000 (est equal TauT)       |
| <b>SLC6A9 (GlyT1)</b>              | <sup>11</sup>                |
| Glycine                            | 220                          |
| Na                                 | 90000 (n=2)                  |
| Cl                                 | 16000                        |
| <b>SLC6A14 (ATB<sup>0,+</sup>)</b> |                              |
| Amino acid EC <sub>50</sub>        | <sup>14</sup>                |
| Isoleucine                         | 6 ± 1                        |
| Leucine                            | 12 ± 2                       |
| Methionine                         | 14 ± 1                       |
| Valine                             | 36 ± 2                       |
| Alanine                            | 99 ± 36                      |
| Glycine                            | 111 ± 30                     |
| Proline                            | >5000                        |
| Serine                             | 43 ± 5                       |
| Cysteine                           | 118 ± 33                     |
| Asparagine                         | 348 ± 84                     |
| Threonine                          | 405 ± 80                     |
| Glutamine                          | 633 ± 62                     |
| Phenylalanine                      | 17 ± 1                       |
| Tryptophan                         | 26 ± 6                       |
| Tyrosine                           | 92 ± 10                      |
| Histidine                          | 76 ± 20                      |
| Lysine                             | 100 ± 1                      |
| Arginine                           | 104 ± 35                     |
| Na                                 | 7400 (n=2.3)                 |
| Cl                                 | 920                          |

|                                   |                                         |
|-----------------------------------|-----------------------------------------|
| <b>SLC6A15 (B<sup>0</sup>AT2)</b> | 15, 16                                  |
| Proline                           | 195±16                                  |
| Alanine                           | 670±92                                  |
| Valine                            | 70 (est average Leu/Ile)                |
| Methionine                        | 40±4                                    |
| Leucine                           | 81±9                                    |
| Isoleucine                        | 58±10                                   |
| Phenylalanine                     | 1050±112                                |
| Na                                | 16000                                   |
| <b>SLC6A17 (NTT4)</b>             | 17                                      |
| Leucine                           | 280                                     |
| Methionine                        | 280 (est equal Leu)                     |
| Proline                           | 360                                     |
| Cysteine                          | 360 (est based on Fig. 5)               |
| Alanine                           | 360 (est based on Fig. 5)               |
| Glutamine                         | 1600                                    |
| Serine                            | 1600 (est based on Fig. 5)              |
| Histidine                         | 2000 (est based on Fig. 5)              |
| Glycine                           | 2000 (est based on Fig. 5)              |
| Na                                | 23000                                   |
| <b>SLC6A19 (B<sup>0</sup>AT1)</b> | 18, 19                                  |
| Methionine                        | 1000 (est based on Fig. 2 Cheng et al.) |
| Leucine                           | 1100                                    |
| Isoleucine                        | 1100 (est based on Fig. 2 Cheng et al.) |
| Valine                            | 4000 (est based on Fig. 2 Cheng et al.) |
| Glutamine                         | 4000                                    |
| Asparagine                        | 4000 (est based on Fig. 2 Cheng et al.) |
| Cysteine                          | 4000 (est based on Fig. 2 Cheng et al.) |
| Phenylalanine                     | 4700                                    |
| Alanine                           | 4100                                    |
| Serine                            | 4000 (est based on Fig. 2 Cheng et al.) |
| Glycine                           | 11700                                   |
| Tyrosine                          | 4700 (est equal Phe)                    |
| Threonine                         | 4000 (est based on Fig. 2 Cheng et al.) |
| Histidine                         | 4000 (est based on Fig. 2 Cheng et al.) |
| Proline                           | 11000 (est equal Gly)                   |
| Tryptophan                        | 4700 (est equal Phe)                    |
| Na                                | 21000                                   |
| <b>SLC6A20 (SIT)</b>              | 20, 21                                  |
| Proline                           | 130                                     |
| Na                                | 22000                                   |
| Cl                                | 2300                                    |

|                    |                         |
|--------------------|-------------------------|
| <b>SLC7 family</b> |                         |
| <b>SLC7A1</b>      | 22                      |
| Arginine           | 77                      |
| Lysine             | 73                      |
| Ornithine          | 105                     |
| <b>SLC7A2</b>      | 23                      |
| Arginine           | 2700 (CAT2A) 38 (CAT2B) |
| Lysine             | 51                      |
| Ornithine          | 174                     |
| <b>SLC7A3</b>      | 24                      |
| Arginine           | 103                     |
| Lysine             | 147                     |
| Ornithine          | 219                     |
| <b>SLC7A4</b>      | Lysosomal               |

|                                   |                                               |
|-----------------------------------|-----------------------------------------------|
| <b>SLC7A5 (LAT1)</b>              | 25                                            |
| Asymmetry of $K_M$                | $K_{M_i}/K_{M_o} = 1000$ <sup>26</sup>        |
| Leucine                           | 20                                            |
| Isoleucine                        | 25                                            |
| Valine                            | 47                                            |
| Methionine                        | 20                                            |
| Phenylalanine                     | 14                                            |
| Tyrosine                          | 28                                            |
| Tryptophan                        | 21                                            |
| Histidine                         | 12                                            |
| Glutamine                         | 1640                                          |
| Asparagine                        | 2150                                          |
| <b>SLC7A6 (y+LAT2)</b>            | 27, 28                                        |
| Arg                               | 138                                           |
| Lys                               | 138 (est based on Fig. 3 and 5 Broer et al.)  |
| His                               | 138 (est based on Fig. 3 and 5 Broer et al.)  |
| Leu                               | 236                                           |
| Tyr                               | 500 (est based on Fig. 3 and 5 Broer et al.)  |
| Trp                               | 236 (est based on Fig. 3 and 5 Broer et al.)  |
| Phe                               | 236 (est based on Fig. 3 and 5 Broer et al.)  |
| Gln                               | 295                                           |
| Met                               | 236 (est based on Fig. 3 and 5 Broer et al.)  |
| Cys                               | 500 (est based on Fig. 3 and 5 Broer et al.)  |
| Ile                               | 500 (est based on Fig. 3 and 5 Broer et al.)  |
| Ala                               | 1000 (est based on Fig. 3 and 5 Broer et al.) |
| Na                                | 5000                                          |
| <b>SLC7A7 (y+LAT1)</b>            | 29, 30                                        |
| Arg                               | 340                                           |
| Lys                               | 68                                            |
| His                               | 44 (est equal Leu)                            |
| Leu                               | 44                                            |
| Tyr                               | 200 (est based on Fig. 8 Kanai et al.)        |
| Phe                               | 300 (est based on Fig. 8 Kanai et al.)        |
| Gln                               | 60 (est based on Fig. 3 Pfeiffer et al.)      |
| Met                               | 60 (est based on Fig. 3 Pfeiffer et al.)      |
| Ile                               | 60 (est based on Fig. 8 Kanai et al.)         |
| Na                                | 15000 (est)                                   |
| <b>SLC7A8 (LAT2)</b>              | 31                                            |
| Asymmetry of $K_M$                | $K_{M_i}/K_{M_o} = 200$ <sup>26</sup>         |
| Histidine                         | 181                                           |
| Tryptophan                        | 58                                            |
| Tyrosine                          | 36                                            |
| Phenylalanine                     | 45                                            |
| Valine                            | 124                                           |
| Isoleucine                        | 97                                            |
| Leucine                           | 119                                           |
| Methionine                        | 204                                           |
| Glutamine                         | 151                                           |
| Asparagine                        | 81                                            |
| Cysteine                          | 109                                           |
| Threonine                         | 69                                            |
| Serine                            | 116                                           |
| Alanine                           | 187                                           |
| Glycine                           | 265 (Low $V_{max}$ 21%)                       |
| <b>SLC7A9 (b<sup>0,+</sup>AT)</b> | 32                                            |
| Asymmetry of $K_M$                | $K_{M_i}/K_{M_o} = 20$ <sup>33</sup>          |
| Arginine                          | 108                                           |

|                               |                                                 |
|-------------------------------|-------------------------------------------------|
| Lysine                        | 394                                             |
| Ornithine                     | 195                                             |
| Cystine                       | 296                                             |
| Alanine                       | 300 (est based on Fig. 6 Mizoguchi et al. 2001) |
| Cysteine                      | 100 (est based on Fig. 6 Mizoguchi et al. 2001) |
| Phenylalanine                 | 100 (est based on Fig. 6 Mizoguchi et al. 2001) |
| Histidine                     | 500 (est based on Fig. 6 Mizoguchi et al. 2001) |
| Isoleucine                    | 400 (est based on Fig. 6 Mizoguchi et al. 2001) |
| Leucine                       | 107                                             |
| Valine                        | 100 (est based on Fig. 6 Mizoguchi et al. 2001) |
| Methionine                    | 100 (est based on Fig. 6 Mizoguchi et al. 2001) |
| Asparagine                    | 500 (est based on Fig. 6 Mizoguchi et al. 2001) |
| Glutamine                     | 500 (est based on Fig. 6 Mizoguchi et al. 2001) |
| Serine                        | 150 (est based on Fig. 6 Mizoguchi et al. 2001) |
| Threonine                     | 100 (est based on Fig. 6 Mizoguchi et al. 2001) |
| Tryptophan                    | 500 (est based on Fig. 6 Mizoguchi et al. 2001) |
| Tyrosine                      | 150                                             |
| <b><i>SLC7A10 (asc-1)</i></b> | <sup>34</sup>                                   |
| Alanine                       | 23                                              |
| Glycine                       | 8                                               |
| Serine                        | 11                                              |
| Threonine                     | 19                                              |
| Cysteine                      | 24                                              |
| Valine                        | 112                                             |
| Methionine                    | 139                                             |
| Isoleucine                    | 160                                             |
| Leucine                       | 245                                             |
| Histidine                     | 368                                             |
| Phenylalanine                 | 464                                             |
| <b><i>SLC7A11 (xCT)</i></b>   | <sup>35</sup>                                   |
| Glutamate                     | 92                                              |
| Cystine                       | 43                                              |
| <b><i>SLC7A12 (AGT-1)</i></b> | <sup>36, 37</sup>                               |
| Aspartate                     | 25                                              |
| Glutamate                     | 21                                              |
| Cystine                       | 68                                              |

|                        |               |
|------------------------|---------------|
| <b>SLC16 family</b>    |               |
| <b><i>SLC16A10</i></b> | <sup>38</sup> |
| Tryptophan             | 3720          |
| Tyrosine               | 2590          |
| Phenylalanine          | 7020          |

|                              |                   |
|------------------------------|-------------------|
| <b>SLC36 family</b>          |                   |
| <b><i>SLC36A1 (PAT1)</i></b> | <sup>39</sup>     |
| Glycine                      | 7000              |
| Proline                      | 2800              |
| Alanine                      | 7500              |
| H                            | 0.3               |
| <b><i>SLC36A2 (PAT2)</i></b> | <sup>39</sup>     |
| Glycine                      | 590               |
| Proline                      | 120               |
| Alanine                      | 260               |
| H                            | 0.01              |
| <b><i>SLC36A3</i></b>        | Not characterised |
| <b><i>SLC36A4</i></b>        | <sup>40</sup>     |
| Proline                      | 3                 |

|                        |                                                  |
|------------------------|--------------------------------------------------|
| Alanine                | 1480                                             |
| Tryptophan             | 2                                                |
| H                      | 0.3 (est equal PAT1)                             |
| <b>SLC38 family</b>    |                                                  |
| <b>SLC38A1 (SNAT1)</b> | 41, 42                                           |
| Ala                    | 306                                              |
| Ser                    | 306 (est based on Fig. 2 Albers et al.)          |
| Thr                    | 890 (est based on Fig. 2 Albers et al.)          |
| Cys                    | 306 (est based on Fig. 2 Albers et al.)          |
| Met                    | 200 (est based on Fig. 2 Albers et al.)          |
| His                    | 230 (est based on Fig. 2 Albers et al.)          |
| Gln                    | 230                                              |
| Asn                    | 306 (est based on Fig. 2 Albers et al.)          |
| Gly                    | 890 (est based on Fig. 2 Albers et al.)          |
| Pro                    | 1000 (est based on Fig. 2 Albers et al.)         |
| Na                     | 9500                                             |
| <b>SLC38A2 (SNAT2)</b> | 42, 43                                           |
| Ala                    | 529                                              |
| Ser                    | 529 (est based on Fig. 2 MacKenzie et al. 2003)  |
| Thr                    | 1900 (est based on Fig. 2 MacKenzie et al. 2003) |
| Cys                    | 529 (est based on Fig. 2 MacKenzie et al. 2003)  |
| Met                    | 800 (est based on Fig. 2 MacKenzie et al. 2003)  |
| His                    | 800 (est based on Fig. 2 MacKenzie et al. 2003)  |
| Gln                    | 1650                                             |
| Asn                    | 600 (est based on Fig. 2 MacKenzie et al. 2003)  |
| Gly                    | 800 (est based on Fig. 2 MacKenzie et al. 2003)  |
| Pro                    | 800 (est based on Fig. 2 MacKenzie et al. 2003)  |
| Na                     | 20000                                            |
| <b>SLC38A3 (SNAT3)</b> | 44, 45                                           |
| Glutamine              | 1500                                             |
| Histidine              | 7400                                             |
| Asparagine             | 1300                                             |
| Na                     | 15000                                            |
| H                      | 0.1                                              |
| <b>SLC38A4 (SNAT4)</b> | 46, 47                                           |
| Ala                    | 4200                                             |
| Arg                    | 300 ± 40                                         |
| Ser                    | 4000 (est based on Fig. 3 Sugawara et al., 2000) |
| Gly                    | 1600 ± 300                                       |
| Cys                    | 4000 (est based on Fig. 3 Sugawara et al., 2000) |
| Asn                    | 3000 (est based on Fig. 3 Sugawara et al., 2000) |
| Thr                    | 3000 (est based on Fig. 3 Sugawara et al., 2000) |
| Pro                    | 3000 (est based on Fig. 3 Sugawara et al., 2000) |
| Met                    | 3000 (est based on Fig. 3 Sugawara et al., 2000) |
| Gln                    | 2500 ± 500                                       |
| Na                     | 70000                                            |
| <b>SLC38A5 (SNAT5)</b> | 48                                               |
| Glycine                | 15200                                            |
| Asn                    | 2500                                             |
| Ala                    | 2500 (est equal Asn)                             |
| Ser                    | 2500 (est equal Asn)                             |
| Gln                    | 3200                                             |
| His                    | 600                                              |
| Na                     | 11000                                            |
| H                      | 0.03                                             |
| <b>SLC38A6</b>         | Uncharacterised                                  |

|                 |                 |
|-----------------|-----------------|
| <i>SLC38A7</i>  | Lysosomal       |
| <i>SLC38A8</i>  | Uncharacterised |
| <i>SLC38A9</i>  | Lysosomal       |
| <i>SLC38A10</i> | ER/Golgi        |

|                       |                                |
|-----------------------|--------------------------------|
| <b>SLC43 family</b>   |                                |
| <i>SLC43A1 (LAT3)</i> | 49                             |
| Leucine               | 1024 ± 31                      |
| Isoleucine            | 1418 ± 47                      |
| Valine                | 1885 ± 107                     |
| Phenylalanine         | 1206 ± 53                      |
| Methionine            | 2000 est                       |
| <i>SLC43A2 (LAT4)</i> | 50                             |
| Leucine               | 3733                           |
| Isoleucine            | 4000 (est between Leu and Phe) |
| Valine                | 4000 (est between Leu and Phe) |
| Phenylalanine         | 4694                           |
| Methionine            | 4000 (est between Leu and Phe) |

#### List S4: Equations for different types of amino acid transporters

Preparatory calculations for all transporters:

Fractional saturation:

Exofacial (ext=extracellular):

$$F_{iext} = \left( \frac{AAi_{ext}}{Km_{appext} + AAi_{ext}} \right)$$

Endofacial (cyt=cytosolic):

$$F_{icyt} = \left( \frac{AAi_{cyt}}{Km_{appcyt} + AAi_{cyt}} \right)$$

Total saturation  $F_T = \sum F_i$

$$F_{AAi} = F_i / F_T$$

#### 1) Electroneutral Uniporter: SLC16A10, SLC43A1, SLC43A2

$J_{Tec}$  = Total flux from extracellular (e) medium to cytosol (c)

$J_{Tce}$  = Total flux from cytosol (c) to extracellular medium (e)

$$J_{Tec} = J_{max}(F_{Ttext})$$

$$J_{Tce} = J_{max}(F_{Tcyt})$$

#### 2) Electrogenic Uniporter (cationic AA): SLC7A1, SLC7A2, SLC7A3

$$J_{Tec} = J_{max}(F_{Ttext}) \left( \beta(1 - F_{Tcyt}) \right)$$

$$J_{Tce} = J_{max}(F_{Tcyt}) \left( \frac{1}{\beta}(1 - F_{Ttext}) \right)$$

#### 3) Na<sup>+</sup>-Symporter: SLC6A15, SLC6A19, SLC38A1, SLC38A2, SLC38A4

$$J_{Tec} = J_{max} \left( (F_{Text}) \left( \frac{Na_{ext}}{Km_{ext} + Na_{ext}} \right) \left( \beta(1 - F_{Tcyt}) \left( \frac{Km_{cyt}}{Km_{cyt} + Na_{cyt}} \right) \right) \right)$$

$$J_{Tce} = J_{max} \left( (F_{Tcyt}) \left( \frac{Na_{cyt}}{Km_{cyt} + Na_{cyt}} \right) \left( \frac{1}{\beta} \right) (1 - F_{Text}) \left( \frac{Km_{ext}}{Km_{ext} + Na_{ext}} \right) \right)$$

**4) Complex symporter 1: SLC1A1, SLC1A2, SLC1A3, SLC1A6, SLC1A7**

$$J_{Tec} = J_{max} (F_{Text}) \left( \frac{(Na_{ext})^3}{(Km_{ext})^3 + (Na_{ext})^3} \right) \left( \frac{(H^+_{ext})}{Km_{ext} + (H_{ext})} \right) \left( \frac{(K_{cyt})}{Km_{cyt} + (K_{cyt})} \right) \\ * \beta(1 - F_{Tcyt}) \left( \frac{(Km_{cyt})^3}{(Km_{cyt})^3 + (Na_{cyt})^3} \right) \left( \frac{Km_{cyt}}{Km_{cyt} + H_{cyt}} \right) \left( \frac{Km_{ext}}{Km_{ext} + K_{ext}} \right)$$

$$J_{Tce} = J_{max} (F_{Tcyt}) \left( \frac{(Na_{cyt})^3}{(Km_{cyt})^3 + (Na_{cyt})^3} \right) \left( \frac{(H^+_{cyt})}{Km_{cyt} + (H_{cyt})} \right) \left( \frac{(K_{ext})}{Km_{ext} + (K_{ext})} \right) \\ * \frac{1}{\beta} (1 - F_{Text}) \left( \frac{(Km_{ext})^3}{(Km_{ext})^3 + (Na_{ext})^3} \right) \left( \frac{Km_{ext}}{Km_{ext} + H_{ext}} \right) \left( \frac{Km_{cyt}}{Km_{cyt} + K_{cyt}} \right)$$

**5) Complex symporter 2: SLC6A7, SLC6A9, SLC6A14, SLC6A17, SLC6A18, SLC6A20**

$$J_{Tec} = J_{max} (F_{Text}) \left( \frac{(Na_{ext})^2}{(Km_{ext})^2 + (Na_{ext})^2} \right) \left( \frac{(Cl^-_{ext})}{Km_{ext} + Cl^-_{ext}} \right) * \beta(1 - F_{Tcyt}) \left( \frac{(Km_{cyt})^2}{(Km_{cyt})^2 + (Na_{cyt})^2} \right) \left( \frac{Km_{cyt}}{Km_{cyt} + Cl_{cyt}} \right)$$

$$J_{Tce} = J_{max} (F_{Tcyt}) \left( \frac{(Na_{cyt})^2}{(Km_{cyt})^2 + (Na_{cyt})^2} \right) \left( \frac{(Cl_{cyt})}{Km_{cyt} + (Cl_{cyt})} \right) * \frac{1}{\beta} (1 - F_{Text}) \left( \frac{(Km_{ext})^2}{(Km_{ext})^2 + (Na_{ext})^2} \right) \left( \frac{Km_{ext}}{Km_{ext} + Cl_{cyt}} \right)$$

**6) Complex symporter 3: SLC6A5**

$$J_{Tec} = J_{max} (F_{Tcyt}) \left( \frac{(Na_{ext})^3}{(Km_{ext})^3 + (Na_{ext})^3} \right) \left( \frac{(Cl^-_{ext})}{Km_{appext} + Cl^-_{ext}} \right) * \beta(1 - F_{Tcyt}) \left( \frac{(Km_{cyt})^3}{(Km_{cyt})^3 + (Na_{cyt})^3} \right) \left( \frac{Km_{cyt}}{Km_{cyt} + Cl_{cyt}} \right)$$

$$J_{Tce} = J_{max} (F_{Tcyt}) \left( \frac{(Na_{cyt})^3}{(Km_{cyt})^3 + (Na_{cyt})^3} \right) \left( \frac{(Cl_{cyt})}{Km_{cyt} + (Cl_{cyt})} \right) * \frac{1}{\beta} (1 - F_{Text}) \left( \frac{(Km_{ext})^3}{(Km_{ext})^3 + (Na_{ext})^3} \right) \left( \frac{Km_{ext}}{Km_{ext} + Cl_{cyt}} \right)$$

**7) Electroneutral symporter: SLC38A3, SLC38A5**

$$J_{Tec} = J_{max} (F_{Text}) \left( \frac{(Na_{ext})}{Km_{ext} + Na_{ext}} \right) \left( \frac{(H^+_{cyt})}{Km_{cyt} + (H^+_{cyt})} \right)$$

$$J_{Tce} = J_{max} (F_{Tcyt}) \left( \frac{(Na_{cyt})}{Km_{cyt} + (Na_{cyt})} \right) \left( \frac{(H^+_{ext})}{Km_{ext} + (H^+_{ext})} \right)$$

**8) Proton-amino acid symporter: SLC36A1, SLC36A2, SLC36A3, SLC36A4**

$$J_{Tec} = J_{max} (F_{Text}) \left( \frac{H_{ext}}{Km_{ext} + H_{ext}} \right) \beta(1 - F_{Tcyt}) \left( \frac{Km_{cyt}}{Km_{cyt} + H_{cyt}} \right)$$

$$J_{Tce} = J_{max} (F_{Tcyt}) \left( \frac{H_{cyt}}{Km_{cyt} + H_{cyt}} \right) \left( \frac{1}{\beta} \right) (1 - F_{Text}) \left( \frac{Km_{ext}}{Km_{ext} + H_{ext}} \right)$$

**9) Antiporter: SLC1A4, SLC1A5, SLC7A5, SLC7A8, SLC7A10, SLC7A11, SLC7A12**

$$J_{Tec} = J_{max} (F_{Text}) (F_{Tcyt})$$



$$J_{Tce} = J_{Tec}$$

### 10) Complex antiporter: SLC7A6, SLC7A7

$$J_{Tec} = J_{max}(F_{T_{ext}})(F_{T_{cyt}})$$

$$J_{Tce} = J_{max}(F_{T_{ext}})(F_{T_{cyt}})$$

If AAi is cationic: Fractional saturation ( $F_{i_{ext}}$ ) =  $\left(\frac{AAi_{ext}}{K_{m_{appext}} + AAi_{ext}}\right)$  and  $F_{i_{cyt}} = \left(\frac{AAi_{cyt}}{K_{m_{appcyt}} + AAi_{cyt}}\right)$

If AAi is neutral: Fractional saturation ( $F_{i_{ext}}$ ) =  $\left(\frac{AAi_{ext}}{K_{m_{appext}} + AAi_{ext}}\right) \left(\frac{Na_{ext}}{K_{m_{ext}} + Na_{ext}}\right)$  and  $F_{i_{cyt}} = \left(\frac{AAi_{cyt}}{K_{m_{appcyt}} + AAi_{cyt}}\right) \left(\frac{Na_{cyt}}{K_{m_{cyt}} + Na_{cyt}}\right)$

### 11) Electrogenic antiporter: SLC7A9

|        | Substrate extracellular | Substrate cytosolic |
|--------|-------------------------|---------------------|
| Mode 1 | Cationic                | Cationic            |
| Mode 2 | Cationic                | Neutral             |
| Mode 3 | Neutral                 | Cationic            |
| Mode 4 | Neutral                 | Neutral             |

Equation for Mode 1 and 4:  $J_{iec} = J_{max}(F_{i_{1ext}})(F_{i_{2cyt}})$

Equation for Mode2:  $J_{iec} = J_{max}(F_{i_{1ext}})(F_{i_{2cyt}})\beta$

Equation for Mode 3:  $J_{iec} = J_{max}(F_{i_{1ext}})(F_{i_{2cyt}})\left(\frac{1}{\beta}\right)$

In each case:  $J_{aa1ce} = J_{aa2ec}$

**Table S5: Predicted and simulated maximal accumulation of substrates by different types of amino acid transporters.**

| Type of transporter                                                           | Theoretical accumulation | Simulated accumulation |
|-------------------------------------------------------------------------------|--------------------------|------------------------|
| Uniporter                                                                     | 1                        | 1                      |
| Uniporter electrogenic                                                        | 10.34                    | 10.34                  |
| 1Na <sup>+</sup> AA Cotransporter                                             | 103.44                   | 103.44                 |
| 3Na <sup>+</sup> /1H <sup>+</sup> AA Cotransporter/ K <sup>+</sup> antiporter | 2568342                  | 1712230*               |
| 2Na <sup>+</sup> /1Cl <sup>-</sup> AA Cotransporter                           | 1410.65                  | 1410.65                |
| 3Na <sup>+</sup> /1Cl <sup>-</sup> AA Cotransporter                           | 145928.5                 | 145928.5               |
| 1Na <sup>+</sup> AA Cotransporter/H <sup>+</sup> antiporter                   | 6.31                     | 5.49*                  |
| 1H <sup>+</sup> AA cotransporter                                              | 8.22                     | 8.22                   |

\* Where antiport processes are involved the simulated accumulation is less than the maximal theoretical accumulation. There are no experimental data available to support or refute this result.

**Table S6: Calculated Vmax values for cell lines used in this study**

Vmax values are given as nmol/min\*mg protein and were calculated  $V_{max} = v * (K_m + [S]) / ([S] * min)$ .

Green fields were used to calculate averages. The table also includes metabolic conversions used in the simulation as %/iteration. For myotubes mRNA expression levels were used instead of calculated Vmax.

| A549                   |          |      |       |          |       |          | U87-MG                 |          |      |        |          |       |          | Myotubes    |        |
|------------------------|----------|------|-------|----------|-------|----------|------------------------|----------|------|--------|----------|-------|----------|-------------|--------|
| Transporter            | Probe AA | Conc | min   | Activity | Km    | Vmax     | Transporter            | Probe AA | Conc | min    | Activity | Km    | Vmax     | Transporter | Vmax   |
| SLC1                   |          |      |       |          |       |          | SLC1                   |          |      |        |          |       |          | SLC1        |        |
| EAAT3                  | Glu      | 100  | 6     | 62       |       |          | EAAT3                  | Glu      | 100  | 6      | 0.37     | 62    | 0.0999   | EAAT3       | 0.0046 |
| EAAT1                  | Glu      | 100  | 6     | 48       |       |          | EAAT1                  | Glu      | 100  | 6      |          | 48    |          | EAAT1       | 0.1353 |
| EAAT2                  | Glu      | 100  | 6     | 48       |       |          | EAAT2                  | Glu      | 100  | 6      |          | 48    |          | EAAT2       | 0.0012 |
| EAAT4                  | Glu      | 100  | 6     | 3        |       |          | EAAT4                  | Glu      | 100  | 6      |          | 3     |          | ASCT1       | 0.2633 |
| EAAT5                  | Glu      | 100  | 6     | 64       |       |          | EAAT5                  | Glu      | 100  | 6      |          | 64    |          | ASCT2       | 0.621  |
| ASCT1                  | Ala      | 300  | 2     | 71       |       |          | ASCT1                  | Ala      | 300  | 2      | 2.7      | 71    | 1.6695   | EAAT4       | 0      |
|                        | Pro      | 100  | 2     | 672      |       | 4.632    |                        | Pro      | 100  | 2      |          | 672   |          | EAAT5       | 0      |
| ASCT2                  | Ala      | 300  | 2     | 48       | 18    | 25.44    | ASCT2                  | Ala      | 300  | 2      | 14.7     | 18    | 7.791    | SLC6        |        |
|                        | Gln      | 100  | 2     | 23       | 24    | 14.26    |                        | Gln      | 100  | 2      | 6        | 24    | 3.72     | GlyT2       | 0      |
|                        | Gly      | 100  | 6     | 1.5      | 361   | 1.1525   |                        |          |      |        |          |       | GlyT1    | 0.1399      |        |
| SLC6                   |          |      |       |          |       |          | SLC6                   |          |      |        |          |       |          | PROT        | 0      |
| GlyT2                  | Gly      | 100  | 6     | 17       |       |          | GlyT2                  | Gly      | 100  | 6      |          | 17    |          | ATB0,+      | 0      |
| GlyT1                  | Gly      | 100  | 6     | 220      |       |          | GlyT1                  | Gly      | 100  | 6      |          | 220   |          | BOAT2       | 0.0233 |
| PROT                   | Pro      | 100  | 6     | 6        |       |          | PROT                   | Pro      | 100  | 2      |          | 6     |          | NTT4        | 0.0602 |
| ATB0,+                 | Leu      | 100  | 2     | 12       |       |          | ATB0,+                 | Leu      | 100  | 2      |          | 12    |          | XT2         | 0      |
|                        | Arg      | 100  | 6     | 104      |       |          |                        | Arg      | 100  | 6      |          | 104   |          | BOAT1       | 0      |
| BOAT2                  | Leu      | 100  | 2     | 81       |       |          | BOAT2                  | Leu      | 100  | 2      | 1.64     | 81    | 1.4842   | SIT1        | 0      |
|                        | Ala      | 300  | 2     | 670      |       |          |                        | Ala      | 300  | 2      | 6.54     | 670   | 10.573   | SLC7        |        |
|                        | Pro      | 100  | 6     | 195      |       |          |                        | Pro      | 100  | 2      | 1.48     | 195   | 2.183    | CAT1        | 0.2181 |
| NTT4                   | Gln      | 100  | 2     | 5200     |       |          | NTT4                   | Gln      | 100  | 2      |          | 5200  |          | CAT2        | 0.3201 |
|                        | Leu      | 100  | 2     | 280      |       |          |                        | Leu      | 100  | 2      |          | 280   |          | CAT3        | 0      |
|                        | Pro      | 100  | 6     | 360      |       |          |                        | Pro      | 100  | 2      |          | 360   |          | CAT4        | 0.0133 |
| BOAT1                  | Leu      | 100  | 2     | 1000     |       |          | BOAT1                  | Leu      | 100  | 2      |          | 1000  |          | LAT1        | 0.7842 |
|                        | Ala      | 300  | 2     | 4100     |       |          |                        | Ala      | 300  | 2      |          | 4100  |          | y+LAT2      | 0.1504 |
|                        | Gln      | 100  | 2     | 3200     |       |          |                        | Gln      | 100  | 2      |          | 3200  |          | y+LAT1      | 0.3596 |
| SIT1                   | Pro      | 100  | 6     | 130      |       |          | SIT1                   | Pro      | 100  | 2      |          | 130   |          | LAT2        | 0.0066 |
|                        |          |      |       |          |       |          |                        |          |      |        |          |       |          | b0,+AT      | 0      |
| SLC7                   |          |      |       |          |       |          | SLC7                   |          |      |        |          |       |          | Asc-1       | 0      |
| CAT1                   | Arg      | 100  | 6     | 10       | 77    | 2.95     | CAT1                   | Arg      | 100  | 6      | 1.56     | 77    | 0.4602   | xCT         | 0.1178 |
| CAT2                   | Arg      | 100  | 6     | 2700     |       |          | CAT2                   | Arg      | 100  | 6      |          | 2700  |          | Asc-2       | 0      |
| CAT3                   | Arg      | 100  | 6     | 103      |       |          | CAT3                   | Arg      | 100  | 6      |          | 103   |          | AGT1        | 0      |
| LAT1                   | Leu      | 100  | 2     | 26       | 20    | 15.6     | LAT1                   | Leu      | 100  | 2      | 18.4     | 20    | 11.04    | SLC16       |        |
|                        | Gln      | 100  | 2     | 3.2      | 1640  | 27.84    |                        | Gln      | 100  | 2      | 1.03     | 1640  | 8.961    | TAT1        | 0.0009 |
| y+LAT2                 | Leu      | 100  | 2     | 6.4      | 236   | 10.752   | y+LAT2                 | Leu      | 100  | 2      | 2.29     | 236   | 3.8472   | SLC36       |        |
|                        | Arg      | 100  | 6     | 15       | 138   | 5.95     |                        | Arg      | 100  | 6      | 5.92     | 138   | 3.3152   | PAT1        | 0.1118 |
| y+LAT1                 | Leu      | 100  | 2     | 44       |       |          | y+LAT1                 | Leu      | 100  | 2      |          | 44    |          | PAT2        | 0      |
|                        | Arg      | 100  | 6     | 340      |       |          |                        | Arg      | 100  | 6      |          | 340   |          | PAT4        | 0.134  |
| LAT2                   | Leu      | 100  | 2     | 12       | 119   | 13.14    | LAT2                   | Leu      | 100  | 2      | 0        | 119   | 0        | SLC38       |        |
|                        | Ala      | 300  | 2     | 11.3     | 187   | 9.171833 |                        | Ala      | 300  | 2      | 0.8      | 187   | 0.649333 | SNAT1       | 0.4219 |
|                        | Gln      | 100  | 2     | 6.8      | 151   | 8.534    |                        | Gln      | 100  | 2      | 0.45     | 151   | 0.56475  | SNAT2       | 1.4933 |
| b0,+AT                 | Leu      | 100  | 2     | 107      |       |          | b0,+AT                 | Leu      | 100  | 2      |          | 107   |          | SNAT3       | 0.0483 |
|                        | Arg      | 100  | 6     | 108      |       |          |                        | Arg      | 100  | 6      |          | 108   |          | SNAT4       | 0.0195 |
| Asc-1                  | Ala      | 300  | 2     | 23       |       |          | Asc-1                  | Ala      | 300  | 2      |          | 23    |          | SNAT5       | 0.187  |
| xCT                    | Glu      | 25   | 6     | 4.8      | 92    | 3.744    | xCT                    | Glu      | 100  | 6      | 0.7      | 92    | 0.224    | SNAT7       | 0.0773 |
| AGT1                   | Glu      | 100  | 6     | 21       |       |          | AGT1                   | Glu      | 100  | 6      |          | 21    |          | SNAT8       | 0      |
| SLC16                  |          |      |       |          |       |          | SLC16                  |          |      |        |          |       |          | SLC43       |        |
| TAT1                   | Phe      | 100  |       |          | 7020  |          | TAT1                   | Phe      | 100  |        |          | 7020  |          | LAT3        | 0.041  |
| SLC36                  |          |      |       |          |       |          | SLC36                  |          |      |        |          |       |          | LAT4        | 0.2367 |
| PAT1                   | Gly      | 100  | 6     | 7000     |       |          | PAT1                   | Gly      | 100  | 6      |          | 7000  |          |             |        |
|                        | Pro      | 100  | 6     | 2800     |       |          |                        | Pro      | 100  | 6      |          | 2800  |          |             |        |
| PAT2                   | Gly      | 100  | 6     | 590      |       |          | PAT2                   | Gly      | 100  | 6      |          | 590   |          |             |        |
|                        | Pro      | 100  | 6     | 120      |       |          |                        | Pro      | 100  | 6      |          | 120   |          |             |        |
| PAT4                   | Pro      | 100  | 6     | 3        |       |          | PAT4                   | Pro      | 100  | 6      |          | 3     |          |             |        |
|                        | Ala      | 300  | 2     | 1480     |       |          |                        | Ala      | 300  | 2      |          | 1480  |          |             |        |
| SLC38                  |          |      |       |          |       |          | SLC38                  |          |      |        |          |       |          |             |        |
| SNAT1                  | Ala      | 300  | 2     | 9        | 306   | 9.09     | SNAT1                  | Ala      | 300  | 2      | 7.59     | 306   | 7.6659   |             |        |
|                        | Gln      | 100  | 2     | 4.5      | 230   | 7.425    |                        | Gln      | 100  | 2      | 1.69     | 230   | 2.7885   |             |        |
|                        | Pro      | 100  | 6     | 7.8      | 1000  | 14.3     |                        | Pro      | 100  | 6      |          | 1000  |          |             |        |
|                        | Gly      | 100  | 6     | 2.1      | 890   | 3.465    |                        | Gly      | 100  | 6      |          | 890   |          |             |        |
| SNAT2                  | Ala      | 300  | 2     | 1.3      | 529   | 1.796167 | SNAT2                  | Ala      | 300  | 2      | 3        | 529   | 4.145    |             |        |
|                        | Gln      | 100  | 2     | 0.6      | 1650  | 5.25     |                        | Gln      | 100  | 2      | 0        | 1650  | 0        |             |        |
|                        | Leu      | 100  | 2     | 5.3      | 1000  | 29.15    |                        | Leu      | 100  | 2      | 0.45     | 1000  | 2.475    |             |        |
|                        | Pro      | 100  | 6     | 3.6      | 800   | 5.4      |                        | Pro      | 100  | 6      |          | 800   |          |             |        |
|                        | Gly      | 100  | 6     | 0.2      | 800   | 0.3      |                        | Gly      | 100  | 6      |          | 800   |          |             |        |
| SNAT3                  | Gln      | 100  | 2     | 1500     |       |          | SNAT3                  | Gln      | 100  | 2      |          | 1500  |          |             |        |
| SNAT4                  | Ala      | 300  | 2     | 4200     |       |          | SNAT4                  | Ala      | 300  | 2      | 3.62     | 4200  | 27.15    |             |        |
|                        | Pro      | 100  | 6     |          |       |          |                        | Pro      | 100  | 6      | 0.53     | 4200  | 3.798333 |             |        |
|                        | Gln      | 100  | 2     | 2500     |       |          |                        | Gln      | 100  | 2      | 5.05     | 2500  | 65.65    |             |        |
|                        | Arg      | 100  | 6     | 3.6      | 300   | 2.4      |                        | Arg      | 100  | 6      | 1.24     | 300   | 0.826667 |             |        |
| SNAT5                  | Ala      | 300  | 2     | 6.9      | 2500  | 32.2     | SNAT5                  | Ala      | 300  | 2      | 3.9      | 2500  | 18.2     |             |        |
|                        | Gln      | 100  | 2     | 4.3      | 3200  | 70.95    |                        | Gln      | 100  | 2      | 2.9      | 3200  | 47.85    |             |        |
|                        | Gly      | 100  | 6     |          | 15200 |          |                        | Gly      | 100  | 2      |          | 15200 |          |             |        |
| SNAT7                  | Gln      | 100  | 2     |          |       |          | SNAT7                  | Gln      | 100  | 2      |          |       |          |             |        |
| SNAT8                  | Gln      | 100  | 2     |          |       |          | SNAT8                  | Gln      | 100  | 2      |          |       |          |             |        |
| SLC43                  |          |      |       |          |       |          | SLC43                  |          |      |        |          |       |          |             |        |
| LAT3                   | Leu      | 100  | 2     |          | 1024  |          | LAT3                   | Leu      | 100  | 2      |          | 1024  |          |             |        |
|                        | Phe      | 100  | 2     |          | 1206  |          |                        | Phe      | 100  | 2      |          | 1206  |          |             |        |
| LAT4                   | Leu      | 100  | 2     |          | 3733  |          | LAT4                   | Leu      | 100  | 2      |          | 3733  |          |             |        |
|                        | Phe      | 100  | 2     |          | 4694  |          |                        | Phe      | 100  | 2      |          | 4694  |          |             |        |
| Amino acid conversion: | Gln/Glu  |      | 0.001 |          |       |          | Amino acid conversion: | Gln/Glu  |      | 0.0003 |          |       |          |             |        |
|                        | Cysn/Cys |      | 1     |          |       |          |                        | Cysn/Cys |      | 1      |          |       |          |             |        |

**Table S7 Chemicals, Media, recombinant proteins and assay kits.**

| <b>Product</b>                                                                          | <b>Source</b>                  | <b>Identifier</b> |
|-----------------------------------------------------------------------------------------|--------------------------------|-------------------|
| DMEM/F-12, no glutamine                                                                 | Thermo Fisher Scientific       | 21331-020         |
| DMEM, high glucose, pyruvate                                                            | Thermo Fisher Scientific       | 11995             |
| DMEM w/o glucose, amino acids, sodium bicarbonate, sodium pyruvate, phenol red (powder) | US Biological                  | D9800-20A         |
| Basal Medium Eagle (BME)                                                                | Thermo Fisher Scientific       | 21010-046         |
| Skeletal Muscle Cell Growth Basal Medium-2                                              | Lonza                          | CC-3246           |
| Fetal Bovine Serum, Performance Plus (US origin)                                        | Thermo Fisher Scientific       | 16000-044         |
| Fetal Bovine Serum, dialyzed (US origin)                                                | Thermo Fisher Scientific       | 26400-044         |
| Horse Serum, heat inactivated (New Zealand origin)                                      | Thermo Fisher Scientific       | 26050-088         |
| SKGM-2 SingleQuots Supplements and Growth Factors                                       | Lonza                          | CC-3244           |
| L-Glutamine (200mM)                                                                     | Thermo Fisher Scientific       | 25030-081         |
| Sodium Pyruvate (100mM)                                                                 | Thermo Fisher Scientific       | 11360-070         |
| Trypsin-EDTA (0.25%), phenol red                                                        | Thermo Fisher Scientific       | 25200-072         |
| Trypsin-EDTA (0.05%), phenol red                                                        | Thermo Fisher Scientific       | 25300-062         |
| ReagentPack Subculture Reagents                                                         | Lonza                          | CC-5034           |
| Penicillin-Streptomycin (10 000 U/mL P, 10mg/ml S)                                      | Thermo Fisher Scientific       | 15140-122         |
| Dimethyl sulfoxide                                                                      | Sigma-Aldrich                  | D8418             |
| Corning BioCoat Collagen I-coated Microplates                                           | Corning                        | 152036            |
| Palmitic Acid                                                                           | MP Biomedicals                 | 100905            |
| Oleic Acid                                                                              | Sigma Aldrich                  | O1383             |
| D-glucose                                                                               | Sigma-Aldrich Inc.             | G8644             |
| TNF- $\alpha$                                                                           | Thermo Fisher Scientific       | PHC3015           |
| RIPA buffer                                                                             | Cell Signaling Technology      | 9806              |
|                                                                                         |                                |                   |
| EZ-Link Sulfo-NHS-LC-Biotin                                                             | Thermo Fisher Scientific       | 21335             |
| cOmplete, mini, EDTA-free protease inhibitor cocktail                                   | Roche Diagnostics GmbH         | 11836170001       |
| High capacity streptavidin agarose resin                                                | Thermo Fisher Scientific       | 20359             |
| SeeBlue Plus2 prestained standard                                                       | Thermo Fisher Scientific       | LC5925            |
| Pierce ECL Western Blotting Substrate                                                   | Thermo Fisher Scientific       | 32209             |
| SuperSignal West Femto Trial Kit                                                        | Thermo Fisher Scientific       | 34094             |
|                                                                                         |                                |                   |
| [ <sup>14</sup> C(U)]-Glycine, >97%, 250 $\mu$ Ci                                       | PerkinElmer                    | NEC276E250UC      |
| [ <sup>14</sup> C(U)]-Alanine, >97%, 50 $\mu$ Ci                                        | PerkinElmer                    | NEC266E050UC      |
| [ <sup>14</sup> C(U)]-Leucine, >97%, 250 $\mu$ Ci                                       | PerkinElmer                    | NEC279E250UC      |
| [ <sup>14</sup> C(U)]-Proline, >97%, 50 $\mu$ Ci                                        | PerkinElmer                    | NEC285E050UC      |
| [ <sup>14</sup> C(U)]-Glutamine, >97%, 50 $\mu$ Ci                                      | PerkinElmer                    | NEC451050UC       |
| [ <sup>14</sup> C(U)]-Glutamic acid, >97%, 50 $\mu$ Ci                                  | PerkinElmer                    | NEC290E050UC      |
| [ <sup>14</sup> C(U)]-Arginine, >97%, 50 $\mu$ Ci                                       | PerkinElmer                    | NEC267E050UC      |
|                                                                                         |                                |                   |
| $\alpha$ -(methylamino)isobutyric acid (MeAIB)                                          | Sigma Aldrich                  | M2383             |
| JPH203 Dihydrochloride                                                                  | MedChemExpress                 | HY-U00445         |
| CB-839 (Telaglenastat)                                                                  | MedChemExpress                 | HY-12248          |
| 2-amino-2-norbornanecarboxylic acid (BCH)                                               | Sigma Aldrich                  | A7902             |
| Loratadine                                                                              | Sigma Aldrich                  | L9664             |
| UCPH-101                                                                                | Cayman Chemical Company        | 21460             |
| Erastin                                                                                 | Sigma Aldrich                  | E7781             |
| DL-threo- $\beta$ -hydroxyaspartic acid                                                 | Sigma Aldrich                  | H2775             |
| Org 25543 hydrochloride                                                                 | Tocris Bioscience              | 4782              |
| Sulfasalazine                                                                           | Cayman Chemical Company        | 15025             |
| Dihydrokainic acid                                                                      | Abcam                          | ab120066          |
| N-ethylmaleimide                                                                        | Sigma Aldrich                  | E3876             |
| Ultima Gold                                                                             | PerkinElmer                    | 6013329           |
|                                                                                         |                                |                   |
| Amino Acid Standard                                                                     | Sigma Aldrich                  | AAS18             |
| Canonical amino acid mix                                                                | Cambridge Isotope Laboratories | MSK-CAA-1         |

|                                                                                                                                 |                                |                  |
|---------------------------------------------------------------------------------------------------------------------------------|--------------------------------|------------------|
| Metabolomics amino acid mix standard                                                                                            | Cambridge Isotope Laboratories | MSK-A2-1.2       |
| L-glutamine ( <sup>13</sup> C-5, 99%)                                                                                           | Cambridge Isotope Laboratories | CLM-1822-H-0.1MG |
| Adonitol (ribitol)                                                                                                              | Sigma Aldrich                  | A5502            |
| Pyridine                                                                                                                        | Sigma Aldrich                  | 270970           |
| Methoxyamine hydrochloride                                                                                                      | Supelco                        | 33045-U          |
| <i>N</i> -( <i>tert</i> -butyldimethylsilyl)- <i>N</i> -methyltrifluoroacetamide with 1% <i>tert</i> -butyldimethylchlorosilane | Sigma Aldrich                  | 00942            |
| Alkanes                                                                                                                         | Sigma Aldrich                  | 68281            |
|                                                                                                                                 |                                |                  |
| Bradford reagent                                                                                                                | Sigma Aldrich                  | B6916            |
| SuperScript II reverse transcriptase                                                                                            | Invitrogen                     | 18064014         |
| 100 bp DNA ladder                                                                                                               | New England BioLabs            | N3231S           |
|                                                                                                                                 |                                |                  |
| RNeasy Mini Kit (50)                                                                                                            | Qiagen                         | 74104            |
| Taq DNA Polymerase (1000 U)                                                                                                     | Qiagen                         | 201205           |
| BCA assay                                                                                                                       | Sigma                          | B9643            |

**Table S8 Cell lines and primary cells.**

| Experimental Models: Cell Lines      | Source                | Identifier |
|--------------------------------------|-----------------------|------------|
| A549                                 | Gifted by Ross Hannan | N/A        |
| U87MG (from Glioma Tumor Cell Panel) | ATCC                  | TCP-1018   |
| Muscle Myoblasts SKGM-2              | Lonza                 | CC-2580    |

**Table S9 Software and scripts**

| Software and scripts                    | Source                                                                                                                                  | Identifier                                    |
|-----------------------------------------|-----------------------------------------------------------------------------------------------------------------------------------------|-----------------------------------------------|
| Origin 2018b                            | OriginLab                                                                                                                               | N/A                                           |
| Microsoft Office Professional Plus 2019 | Microsoft Corporation                                                                                                                   | N/A                                           |
| MatLab 2019b                            | Mathworks                                                                                                                               | N/A                                           |
| Thermo Xcalibur 4.1                     | Thermo Fisher Scientific                                                                                                                | N/A                                           |
| TraceFinder 3.3                         | Thermo Fisher Scientific                                                                                                                | N/A                                           |
| DExSI 1.11                              | <a href="https://github.com/DExSI/DExSI/">https://github.com/DExSI/DExSI/</a>                                                           | N/A                                           |
| Image J                                 | <a href="https://imagej.nih.gov/ij/">https://imagej.nih.gov/ij/</a>                                                                     | N/A                                           |
| Oncomine                                | <a href="https://www.oncomine.org">https://www.oncomine.org</a>                                                                         | N/A                                           |
| JDFC_v1.1                               | <a href="https://github.com/stefanbroeet/JDFC_v1.1">stefanbroeet/JDFC_v1.1:</a><br><a href="#">Updated version of JDFC (github.com)</a> | JDFC                                          |
| Prism 9.0                               | Graphpad                                                                                                                                | N/A                                           |
| Biorender                               | Biorender.com                                                                                                                           | Images 1, 6h, 8a were created using Biorender |

**Table S10 Amino acid concentrations used for PHM treatment.** PHM media baseline AA concentrations (0.5x). Concentrations match mean physiological levels found in human plasma (values published in the Human Metabolome Database, HMDB; LIVRQNachHKFT (bold) were added at specified fold concentrations above plasma level (2x/5x; Nac is not endogenous in plasma and was proportionally scaled between 0.2/0.5 mM)

| Amino Acid      | [0.5x] (mM) | [2x] (mM) | [5x] (mM) |
|-----------------|-------------|-----------|-----------|
| Glycine         | 0.126       | 0.126     | 0.126     |
| Alanine         | 0.224       | 0.224     | 0.224     |
| <b>Arginine</b> | 0.054       | 0.272     | 0.598     |
| Asparagine      | 0.024       | 0.024     | 0.024     |
| Aspartate       | 0.01        | 0.01      | 0.01      |
| Cysteine        | 0.037       | 0.037     | 0.037     |
| Glutamate       | 0.032       | 0.032     | 0.032     |

|                         |       |       |       |
|-------------------------|-------|-------|-------|
| <b>Glutamine</b>        | 0.281 | 1.405 | 3.092 |
| Histidine               | 0.05  | 0.251 | 0.553 |
| <b>Isoleucine</b>       | 0.033 | 0.166 | 0.365 |
| <b>Leucine</b>          | 0.076 | 0.381 | 0.84  |
| Lysine                  | 0.109 | 0.546 | 1.202 |
| Methionine              | 0.014 | 0.014 | 0.014 |
| Phenylalanine           | 0.037 | 0.185 | 0.408 |
| Proline                 | 0.095 | 0.095 | 0.095 |
| Serine                  | 0.071 | 0.071 | 0.071 |
| Threonine               | 0.075 | 0.377 | 0.83  |
| Tryptophan              | 0.03  | 0.03  | 0.03  |
| Tyrosine                | 0.038 | 0.038 | 0.038 |
| <b>Valine</b>           | 0.117 | 0.585 | 1.288 |
| <b>N-acetylcysteine</b> | N/A   | 0.2   | 0.5   |

**Table S11 RT-PCR primers used in this study.**

| <b>Transporter</b>       | <b>Forward Primer</b> | <b>Reverse Primer</b>   | <b>Fragment size bp</b> |
|--------------------------|-----------------------|-------------------------|-------------------------|
| <b>SLC1</b>              |                       |                         |                         |
| EAAT3 (A1)               | CCTGGTGTACCCAGAAAGT   | TTGCGGAATATTTCCCAGTC    | 491                     |
| EAAT2 (A2)               | ATCAAGAAGGGCCTGGAGTT  | TCCAACAGGAAGGACGAATC    | 492                     |
| EAAT1 (A3)               | CATGCACAGAGAAGGCAAAA  | GTCACGGTGTACATGGCAAG    | 498                     |
| ASCT1 (A4)               | GATCCCATAGGCACTGAGA   | TGGGGAGAATAAACCTGCTG    | 485                     |
| ASCT2 (A5)               | GCAGCCTTTCGCTCATACTC  | GGGCAAAGAGTAAACCCACA    | 307                     |
| EAAT4 (A6)               | CACCTACCGCCAGATCAAGT  | GCTCAGACCCGTTCTCTGTC    | 416                     |
| EAAT5 (A7)               | TCCTCATCCTGTCTGTGCTG  | CTTGACAACCTGGGGTGGTCT   | 449                     |
|                          |                       |                         |                         |
| <b>SLC3</b>              |                       |                         |                         |
| rBAT (A1)                | CCAGTTGGCACTTTGACGAA  | AGTGTCTAGCATGCTGAGGT    | 470                     |
| 4F2hc (A2)               | GAGCCGAGAAGAATGGTCTG  | AGCCGATTGCAAGAGACTGT    | 481                     |
|                          |                       |                         |                         |
| <b>SLC6</b>              |                       |                         |                         |
| GlyT1 (A5)               | GAGAACTCACGGATGCCAC   | AGCAGCCCAGAGTAAACACT    | 454                     |
| PROT (A7)                | CCCAGTTCCACCACTTGTG   | AGATGAGCCCTGAGAACACC    | 461                     |
| GlyT2 (A9)               | CAGACTCATTTACGTGGGGG  | GGTGATGGTAATCGGCTTT     | 443                     |
| ATB <sup>0+</sup> (A14)  | AGAGGCTCTAGCCAACTCC   | AGCTCTCCACCATAGCCAGA    | 394                     |
| B <sup>0</sup> AT2 (A15) | TCTGGGATTTGGTGGTGTCA  | AAGGCCTAGATTGACCAGCA    | 484                     |
| NTT5 (A16)               | GCCTCTTCTTCACTCGACCT  | TGGTGACTIONTAGGGGTAGGGA | 475                     |
| NTT4 (A17)               | TCAACTTCTCCACCTGACC   | CCACAGCGATGTTCTCAAGG    | 457                     |
| B <sup>0</sup> AT3 (A18) | GCTCTCTAGTGCTGGGTGTG  | TGTTCTGTTGAGGTCCGGTG    | 504                     |
| B <sup>0</sup> AT1 (A19) | TACGGTGTGGACAGGTTCAA  | TACTTCAGGTCCCCGTTCA     | 377                     |
| IMINO (A20)              | CCAACCTCGCTACAGTTCGTG | AGGGACGGCGAGATATTGAG    | 454                     |
|                          |                       |                         |                         |
| <b>SLC7</b>              |                       |                         |                         |
| CAT1 (A1)                | CTATGGCGAGTTTGGTGCTC  | TCAAACAGAGACGGCCTGAT    | 452                     |
| CAT2 (A2)                | CTGCTATGCCGAATTTGGGG  | TTCAGAAGGTGGCTCTCTGG    | 463                     |
| CAT3 (A3)                | CACTCAACTCCATCCCCACT  | AGTGGACATAGAGAGTGCCG    | 462                     |
| CAT4 (A4)                | CTGGGCTTCTTGGATGGGTA  | ATAGCCTGCACTGTCTCCTC    | 464                     |
| LAT1 (A5)                | GAAGGCACCAAACCTGGATGT | AGAGCAGGGTCATCACACAC    | 460                     |
| y <sup>+</sup> LAT2 (A6) | GGCATGTTCACTGGACCAT   | TAGCAGCCAGGACATTCCGA    | 520                     |
| y <sup>+</sup> LAT1 (A7) | GATAATTCCACTGTCAGTTG  | CCACGATCCTTCGGAGGTAA    | 500                     |
| LAT2 (A8)                | AACCTTCCCAGAGCCATCTT  | GGGGGATATCAGGCTTCTTC    | 473                     |
| asc (A10)                | GACACTTCGAGGAGCTGAGG  | GTGTCTGACGTGGATCATGG    | 449                     |
| xCT (A11)                | CCATGGCCATTGTCACCATT  | GGATGAACAGTGGCACCTTG    | 465                     |
|                          |                       |                         |                         |

|                |                       |                       |     |
|----------------|-----------------------|-----------------------|-----|
| SLC16          |                       |                       |     |
| TAT1 (A10)     | GTGTGGGCAGTTGGAATACC  | GAGCCCAGTTTGTACGAAG   | 458 |
|                |                       |                       |     |
| SLC36          |                       |                       |     |
| PAT1 (A1)      | GGGAAGACGTGTTGTGGACT  | TCCGAGGATCCTTCATTTTG  | 523 |
| PAT2 (A2)      | ACGTCCCTGCAGAAATCATC  | ACCGAACAAAAGTGGTGGAG  | 375 |
| PAT3 (A3)      | CCCAGCAACCTACCCTTGAT  | GGATGAGGATGGCTGAGACA  | 445 |
| PAT4 (A4)      | CAGCTGGGATTCTGTAGTGTT | CCCATGCCAATATTCAACCGC | 449 |
|                |                       |                       |     |
| SLC38          |                       |                       |     |
| SNAT1 (A1)     | GAACACTGGAGCAATGCTGA  | AACAAACATGGCGAAAAAGG  | 490 |
| SNAT2 (A2)     | GTGGCCTTTCCTTGTTGTGT  | TGTCAGGGTTCACAGCCATTA | 494 |
| SNAT3 (A3)     | TGCAGCACGAGATGGTGGAG  | GTAGCCCAGCTGCTCATAGG  | 389 |
| SNAT4 (A4)     | ATGGAGAAGTTGAAGATGAA  | GATCATAAATCCAGTCAATT  | 450 |
| SNAT5 (A5)     | GCCATGTTCTGCATGTATGG  | GGGTACAATGCGGAGGTAGA  | 381 |
| SNAT6 (A6)     | AAAGCTGTAACAATGATGTT  | ATGAGTGCTAAACTAAAATT  | 290 |
| SNAT7 (A7)     | CTGACCTTTGGAGCTGCTGT  | CTGTGGTCTGGCCGAAGATG  | 460 |
| SNAT8 (A8)     | CTACCCAGGCAATGATATGG  | ACTAGCTGCCCATCAGAACA  | 460 |
| SNAT9 (A9)     | TTCAGTTTCCACAGCTGACT  | ATGAATACAAAGGCCAGTCC  | 490 |
| SNAT10 (A10)   | TTGCTGGACCAGCAGGAGAA  | CGCCAGTAACGTCCTGACTT  | 520 |
| SNAT11 (A11)   | ACCCACAGTAGCTAAGTGGT  | CTGCTGAACATGAGACTCTG  | 610 |
|                |                       |                       |     |
| SLC43          |                       |                       |     |
| LAT3 (A1)      | CCTTCATGTCACCCCAGGAT  | GGCATTGGTGAGCTTTTGGGA | 437 |
| LAT4 (A2)      | GTCTCCTTCATCGTCGTCCT  | GGTGTAGAGGCCAACTGTCT  | 480 |
|                |                       |                       |     |
| Control        |                       |                       |     |
| Clathrin (clh) | GACAGTGCCATCATGAATCC  | TTTGTGCTTCTGGAGGAAAGA | 724 |

**Table S12 Primary and secondary antibodies used in this study.**

| <b>Primary antibodies</b>        | <b>Source</b>           | <b>Identifier</b> | <b>Dilution</b>   |
|----------------------------------|-------------------------|-------------------|-------------------|
| EAAT3 (SLC1A1)                   | Gifted by David Pow     | N/A               | 1:1000            |
| EAAT1 (SLC1A3)                   | Abcam                   | ab416             | 1:1000            |
| ASCT1 (SLC1A4)                   | Cell Signaling          | 8442              | 1:1000            |
| ASCT2 (SLC1A5)                   | Cell Signaling          | D7C12             | 1:2000            |
| GlyT2 (SLC6A9)                   | Abcam                   | ab99098           | 1:1000            |
| B0AT2 (SLC6A15)                  | Pineda Antibody Service | Custom antibody   | 1:4000            |
| CAT1 (SLC7A1)                    | MyBioSource             | MBS176763         | 0.5ug/mL          |
| LAT1 (SLC7A5)                    | Cell Signaling          | 5347              | 1:2000            |
| y+LAT2 (SLC7A6)                  | Abcam                   | ab235054          | 1:1000            |
| LAT2 (SLC7A8)                    | Abcam                   | ab123896          | 1:1000            |
| xCT (SLC7A11)                    | Abcam                   | ab175186          | 1:2000            |
| SNAT1 (SLC38A1)                  | Cell Signaling          | D9L2P             | 1:2000            |
| SNAT2 (SLC38A2)                  | Abcam                   | ab90677           | 1:2000            |
| SNAT4 (SLC38A4)                  | Abcam                   | ab58785           | 1:1000            |
| SNAT5 (SLC38A5)                  | Abcam                   | ab72717           | 1:2000            |
| LAT3 (SLC43A1)                   | Sigma                   | SAB4503399        | 1:1000            |
| Sodium Potassium ATPase          | Abcam                   | ab76020           | 1:5000            |
| <b>Secondary antibodies</b>      | <b>Source</b>           | <b>Identifier</b> | <b>Dilution</b>   |
| Goat anti-rabbit IgG, HRP-linked | Cell Signaling          | 7074              | 1:2000 – 1:10 000 |
| Horse anti-mouse IgG, HRP-linked | Cell Signaling          | 7076              | 1:2000 – 1:4000   |

**Table S13 Recovery of amino acids after repeated washing steps.** Washing steps with 0.9% NaCl are shown as NaCl, washing steps with milli-Q water are shown as mQ. Multipliers are shown before the washing step.

|   | 0xNaCl/1xmQ |          | 1xNaCl/1xmQ |          | 2xNaCl/1xmQ |          |
|---|-------------|----------|-------------|----------|-------------|----------|
|   | Mean        | Std      | Mean        | Std      | Mean        | Std      |
| F | 892.9552    | 50.41358 | 748.3765    | 23.64324 | 716.0219    | 26.97582 |
| L | 1426.517    | 81.23733 | 1150.656    | 36.77618 | 1110.729    | 31.55748 |
| I | 1152.622    | 67.36913 | 929.9874    | 51.25624 | 879.2178    | 10.30266 |
| M | 254.8242    | 20.96939 | 228.97      | 11.57001 | 221.8048    | 10.53362 |
| V | 1208.482    | 82.74615 | 974.7722    | 49.55549 | 935.8306    | 29.04608 |
| P | 9520.033    | 425.6615 | 9230.468    | 545.921  | 8701.121    | 251.61   |
| Y | 992.7762    | 40.70558 | 812.5854    | 42.38067 | 773.854     | 26.2552  |
| A | 14874.3     | 738.834  | 13601.47    | 459.9651 | 13600.03    | 322.8966 |
| T | 4302.316    | 165.5492 | 4059.91     | 139.263  | 3946.179    | 63.26429 |
| Q | 289.0845    | 22.52361 | 255.3397    | 13.90706 | 224.3138    | 8.559583 |
| G | 28910.14    | 4325.78  | 19640.32    | 3345.344 | 19009.79    | 1047.712 |
| E | 22661.14    | 1805.414 | 21798.58    | 1146.214 | 20714.76    | 1156.223 |
| S | 1706.097    | 115.0672 | 1574.41     | 128.9708 | 1539.293    | 110.4684 |
| D | 16766.21    | 6431.221 | 14465.72    | 3370.373 | 13729.16    | 2399.64  |
| K | 766.659     | 70.63187 | 522.0725    | 74.62875 | 409.2678    | 22.32327 |
| R | 428.0397    | 65.99567 | 289.6747    | 26.96622 | 275.8929    | 26.87871 |
| H | 514.07      | 63.46167 | 361.0778    | 19.58092 | 358.7841    | 20.71313 |

**Table S14. Parameters of amino acid quantification.**

| Analyte        | Molecular formula                                            | MW (g mol <sup>-1</sup> ) | Parent ion (m/z) | CE (eV) | T <sub>R</sub> (min) | Quantification | Base peak product ion (m/z) | Qualifier product ion (m/z) | LOD (ppm) | LLOQ (ppm) | Linear regression equation | Correlation coefficient | Ionisation polarity |
|----------------|--------------------------------------------------------------|---------------------------|------------------|---------|----------------------|----------------|-----------------------------|-----------------------------|-----------|------------|----------------------------|-------------------------|---------------------|
| Glycine        | C <sub>2</sub> H <sub>5</sub> NO <sub>2</sub>                | 75.07                     | 76.0393          | -       | 12.57                | a              | -                           | -                           | 13.628    | 22.713     | y=0.08387x+0.01813         | 0.99958                 | +                   |
| Alanine        | C <sub>3</sub> H <sub>7</sub> NO <sub>2</sub>                | 89.09                     | 90.0550          | -       | 11.95                | a              | -                           | -                           | 15.02     | 25.034     | y+0.07653 - 0.03334        | 0.99920                 | +                   |
| Valine         | C <sub>5</sub> H <sub>11</sub> NO <sub>2</sub>               | 117.15                    | 118.0863         | 10.0    | 10.05                | b              | 72.0813                     | 72.0813                     | 0.129     | 0.215      | y=0.10335x+0.11064         | 0.99886                 | +                   |
| Leucine        | C <sub>6</sub> H <sub>13</sub> NO <sub>2</sub>               | 131.17                    | 132.1019         | 10.0    | 8.98                 | b              | 86.0965                     | 69.0704                     | 0.161     | 0.2683     | y=0.0953x+0.04235          | 0.99951                 | +                   |
| Isoleucine     | C <sub>6</sub> H <sub>13</sub> NO <sub>2</sub>               | 131.17                    | 132.1019         | 10.0    | 8.57                 | b              | 86.0965                     | 86.0965                     | 0.2725    | 0.4541     | y=0.09675x+0.05373         | 0.99916                 | +                   |
| Methionine     | C <sub>5</sub> H <sub>11</sub> NO <sub>2</sub> S             | 149.21                    | 150.0583         | 13.5    | 9.53                 | b              | 56.0500                     | 104.0530                    | 0.1516    | 0.2526     | y=0.09664x+0.02959         | 0.99975                 | +                   |
| Phenyl-alanine | C <sub>9</sub> H <sub>11</sub> NO <sub>2</sub>               | 165.19                    | 166.0865         | 12.0    | 8.48                 | b              | 120.0811                    | 120.0811                    | 0.037     | 0.0617     | y=0.05395x+0.1147          | 0.99827                 | +                   |
| Proline        | C <sub>5</sub> H <sub>9</sub> NO <sub>2</sub>                | 115.13                    | 116.0706         | 16.0    | 10.15                | b              | 70.0654                     | 70.0654                     | 0.0387    | 0.0645     | y=0.08993x+0.06677         | 0.99892                 | +                   |
| Serine         | C <sub>3</sub> H <sub>7</sub> NO <sub>3</sub>                | 105.09                    | 106.0499         | 11.0    | 12.94                | b              | 60.0448                     | 60.0448                     | 3.5664    | 5.944      | y=0.09713x+0.22671         | 0.99778                 | +                   |
| Threonine      | C <sub>4</sub> H <sub>9</sub> NO <sub>3</sub>                | 119.12                    | 120.0655         | 12.0    | 12.10                | b              | 74.0603                     | 74.0603                     | 4.1761    | 6.9601     | y=0.09751x+0.06334         | 0.99905                 | +                   |
| Tyrosine       | C <sub>9</sub> H <sub>11</sub> NO <sub>3</sub>               | 181.19                    | 182.0812         | 12.5    | 11.00                | b              | 136.0751                    | 136.0751                    | 1.9891    | 3.3151     | y=0.10508x+0.08068         | 0.99806                 | +                   |
| Glutamine      | C <sub>5</sub> H <sub>10</sub> N <sub>2</sub> O <sub>3</sub> | 146.14                    | 147.0764         | 13.0    | 12.48                | b              | 84.0450                     | 102.0548                    | 4.4133    | 7.3554     | y=0.09132x+0.11506         | 0.99604                 | +                   |
| Aspartic acid  | C <sub>4</sub> H <sub>7</sub> NO <sub>4</sub>                | 133.11                    | 134.0448         | -       | 13.30                | a              | -                           | -                           | 32.093    | 53.488     | y=0.09707x+0.00648         | 0.99952                 | +                   |
| Glutamic acid  | C <sub>5</sub> H <sub>9</sub> NO <sub>4</sub>                | 147.13                    | 148.0604         | 12.0    | 12.75                | b              | 84.0450                     | 102.0547                    | 14.753    | 24.588     | y=0.09298x+0.05271         | 0.99908                 | +                   |
| Arginine       | C <sub>6</sub> H <sub>14</sub> N <sub>4</sub> O <sub>2</sub> | 174.20                    | 175.1190         | 18.0    | 14.05                | b              | 70.0658                     | 158.0926                    | 8.4227    | 14.038     | y=0.10889x+0.02004         | 0.99974                 | +                   |
| Lysine         | C <sub>6</sub> H <sub>11</sub> N <sub>2</sub> O <sub>2</sub> | 146.19                    | 147.1128         | 11.0    | 13.99                | b              | 84.0808                     | 101.1080                    | 2.4048    | 4.008      | y=0.09899x+0.03442         | 0.99935                 | +                   |
| Histidine      | C <sub>6</sub> H <sub>9</sub> N <sub>3</sub> O <sub>2</sub>  | 155.15                    | 156.0768         | 15.5    | 14.05                | b              | 110.0710                    | 110.0710                    | 0.4415    | 0.7358     | y=0.10406x+0.06246         | 0.99984                 | +                   |

Table S15: Statistical analysis of Fig. 2 and 3 by One-way ANOVA with Tukey Kramer multiple comparison test. A q value > 4.656 equates to a p-value < 0.05.

| Fig. 2     |   |    |        |   | Difference | q      | Significance | p       |
|------------|---|----|--------|---|------------|--------|--------------|---------|
| Comparison |   |    |        |   |            |        |              |         |
| Leucine    |   |    |        |   |            |        |              |         |
| Column     | A | vs | Column | B | 4.248      | 11.697 | ***          | P<0.001 |
| Column     | A | vs | Column | C | 21.423     | 58.996 | ***          | P<0.001 |
| Column     | A | vs | Column | D | 22.576     | 50.764 | ***          | P<0.001 |
| Column     | A | vs | Column | E | 2.566      | 7.066  | ***          | P<0.001 |
| Column     | A | vs | Column | F | 5.538      | 15.25  | ***          | P<0.001 |
| Column     | A | vs | Column | G | 1.006      | 2.642  | ns           | P>0.05  |
| Column     | A | vs | Column | H | 18.455     | 50.824 | ***          | P<0.001 |
| Column     | A | vs | Column | I | 22.988     | 63.307 | ***          | P<0.001 |
| Column     | A | vs | Column | J | 22.911     | 66.509 | ***          | P<0.001 |
| Column     | A | vs | Column | K | 1.787      | 4.017  | ns           | P>0.05  |
| Column     | B | vs | Column | C | 17.175     | 47.299 | ***          | P<0.001 |
| Column     | B | vs | Column | D | 18.329     | 41.214 | ***          | P<0.001 |
| Column     | B | vs | Column | E | -1.682     | 4.631  | ns           | P>0.05  |
| Column     | B | vs | Column | F | 1.29       | 3.553  | ns           | P>0.05  |
| Column     | B | vs | Column | G | -3.241     | 8.511  | ***          | P<0.001 |
| Column     | B | vs | Column | H | 14.208     | 39.126 | ***          | P<0.001 |
| Column     | B | vs | Column | I | 18.74      | 51.61  | ***          | P<0.001 |
| Column     | B | vs | Column | J | 18.664     | 54.179 | ***          | P<0.001 |
| Column     | B | vs | Column | K | -2.461     | 5.533  | **           | P<0.01  |
| Column     | C | vs | Column | D | 1.154      | 2.594  | ns           | P>0.05  |
| Column     | C | vs | Column | E | -18.857    | 51.93  | ***          | P<0.001 |
| Column     | C | vs | Column | F | -15.885    | 43.746 | ***          | P<0.001 |
| Column     | C | vs | Column | G | -20.416    | 53.608 | ***          | P<0.001 |
| Column     | C | vs | Column | H | -2.968     | 8.172  | ***          | P<0.001 |
| Column     | C | vs | Column | I | 1.565      | 4.311  | ns           | P>0.05  |
| Column     | C | vs | Column | J | 1.489      | 4.322  | ns           | P>0.05  |
| Column     | C | vs | Column | K | -19.636    | 44.153 | ***          | P<0.001 |
| Column     | D | vs | Column | E | -20.011    | 44.995 | ***          | P<0.001 |
| Column     | D | vs | Column | F | -17.039    | 38.313 | ***          | P<0.001 |
| Column     | D | vs | Column | G | -21.57     | 46.961 | ***          | P<0.001 |
| Column     | D | vs | Column | H | -4.121     | 9.267  | ***          | P<0.001 |
| Column     | D | vs | Column | I | 0.4116     | 0.9255 | ns           | P>0.05  |
| Column     | D | vs | Column | J | 0.3349     | 0.7794 | ns           | P>0.05  |
| Column     | D | vs | Column | K | -20.79     | 40.484 | ***          | P<0.001 |
| Column     | E | vs | Column | F | 2.972      | 8.184  | ***          | P<0.001 |
| Column     | E | vs | Column | G | -1.56      | 4.095  | ns           | P>0.05  |
| Column     | E | vs | Column | H | 15.889     | 43.758 | ***          | P<0.001 |
| Column     | E | vs | Column | I | 20.422     | 56.241 | ***          | P<0.001 |
| Column     | E | vs | Column | J | 20.345     | 59.06  | ***          | P<0.001 |
| Column     | E | vs | Column | K | -0.7792    | 1.752  | ns           | P>0.05  |
| Column     | F | vs | Column | G | -4.531     | 11.898 | ***          | P<0.001 |
| Column     | F | vs | Column | H | 12.918     | 35.574 | ***          | P<0.001 |
| Column     | F | vs | Column | I | 17.45      | 48.057 | ***          | P<0.001 |
| Column     | F | vs | Column | J | 17.374     | 50.434 | ***          | P<0.001 |



|           |   |    |        |   |          |        |     |         |
|-----------|---|----|--------|---|----------|--------|-----|---------|
| Column    | F | vs | Column | K | -3.751   | 8.434  | *** | P<0.001 |
| Column    | G | vs | Column | H | 17.449   | 45.816 | *** | P<0.001 |
| Column    | G | vs | Column | I | 21.982   | 57.718 | *** | P<0.001 |
| Column    | G | vs | Column | J | 21.905   | 60.324 | *** | P<0.001 |
| Column    | G | vs | Column | K | 0.7803   | 1.699  | ns  | P>0.05  |
| Column    | H | vs | Column | I | 4.533    | 12.483 | *** | P<0.001 |
| Column    | H | vs | Column | J | 4.456    | 12.936 | *** | P<0.001 |
| Column    | H | vs | Column | K | -16.668  | 37.48  | *** | P<0.001 |
| Column    | I | vs | Column | J | -0.07672 | 0.2227 | ns  | P>0.05  |
| Column    | I | vs | Column | K | -21.201  | 47.672 | *** | P<0.001 |
| Column    | J | vs | Column | K | -21.125  | 49.167 | *** | P<0.001 |
| Glutamine |   |    |        |   |          |        |     |         |
| Column    | A | vs | Column | B | 17.359   | 44.352 | *** | P<0.001 |
| Column    | A | vs | Column | C | 15.983   | 44.044 | *** | P<0.001 |
| Column    | A | vs | Column | D | 0.2762   | 0.7057 | ns  | P>0.05  |
| Column    | A | vs | Column | E | 0.6196   | 1.649  | ns  | P>0.05  |
| Column    | A | vs | Column | F | 5.013    | 12.184 | *** | P<0.001 |
| Column    | A | vs | Column | G | 6.712    | 16.311 | *** | P<0.001 |
| Column    | A | vs | Column | H | -0.3667  | 1.091  | ns  | P>0.05  |
| Column    | A | vs | Column | I | 2.713    | 7.899  | *** | P<0.001 |
| Column    | A | vs | Column | J | 18.844   | 45.796 | *** | P<0.001 |
| Column    | B | vs | Column | C | -1.376   | 3.317  | ns  | P>0.05  |
| Column    | B | vs | Column | D | -17.083  | 38.834 | *** | P<0.001 |
| Column    | B | vs | Column | E | -16.739  | 39.302 | *** | P<0.001 |
| Column    | B | vs | Column | F | -12.346  | 26.964 | *** | P<0.001 |
| Column    | B | vs | Column | G | -10.647  | 23.255 | *** | P<0.001 |
| Column    | B | vs | Column | H | -17.726  | 45.289 | *** | P<0.001 |
| Column    | B | vs | Column | I | -14.646  | 36.808 | *** | P<0.001 |
| Column    | B | vs | Column | J | 1.485    | 3.243  | ns  | P>0.05  |
| Column    | C | vs | Column | D | -15.707  | 37.873 | *** | P<0.001 |
| Column    | C | vs | Column | E | -15.364  | 38.42  | *** | P<0.001 |
| Column    | C | vs | Column | F | -10.97   | 25.292 | *** | P<0.001 |
| Column    | C | vs | Column | G | -9.272   | 21.376 | *** | P<0.001 |
| Column    | C | vs | Column | H | -16.35   | 45.055 | *** | P<0.001 |
| Column    | C | vs | Column | I | -13.27   | 35.875 | *** | P<0.001 |
| Column    | C | vs | Column | J | 2.861    | 6.595  | *** | P<0.001 |
| Column    | D | vs | Column | E | 0.3434   | 0.8062 | ns  | P>0.05  |
| Column    | D | vs | Column | F | 4.737    | 10.346 | *** | P<0.001 |
| Column    | D | vs | Column | G | 6.435    | 14.056 | *** | P<0.001 |
| Column    | D | vs | Column | H | -0.6429  | 1.642  | ns  | P>0.05  |
| Column    | D | vs | Column | I | 2.437    | 6.125  | **  | P<0.01  |
| Column    | D | vs | Column | J | 18.568   | 40.554 | *** | P<0.001 |
| Column    | E | vs | Column | F | 4.394    | 9.886  | *** | P<0.001 |
| Column    | E | vs | Column | G | 6.092    | 13.707 | *** | P<0.001 |
| Column    | E | vs | Column | H | -0.9863  | 2.626  | ns  | P>0.05  |
| Column    | E | vs | Column | I | 2.094    | 5.475  | **  | P<0.01  |
| Column    | E | vs | Column | J | 18.224   | 41.005 | *** | P<0.001 |
| Column    | F | vs | Column | G | 1.698    | 3.574  | ns  | P>0.05  |
| Column    | F | vs | Column | H | -5.38    | 13.075 | *** | P<0.001 |

|         |   |    |        |   |         |        |     |         |
|---------|---|----|--------|---|---------|--------|-----|---------|
| Column  | F | vs | Column | I | -2.3    | 5.507  | **  | P<0.01  |
| Column  | F | vs | Column | J | 13.831  | 29.109 | *** | P<0.001 |
| Column  | G | vs | Column | H | -7.078  | 17.202 | *** | P<0.001 |
| Column  | G | vs | Column | I | -3.998  | 9.573  | *** | P<0.001 |
| Column  | G | vs | Column | J | 12.132  | 25.534 | *** | P<0.001 |
| Column  | H | vs | Column | I | 3.08    | 8.966  | *** | P<0.001 |
| Column  | H | vs | Column | J | 19.211  | 46.687 | *** | P<0.001 |
| Column  | I | vs | Column | J | 16.131  | 38.621 | *** | P<0.001 |
| Alanine |   |    |        |   |         |        |     |         |
| Column  | A | vs | Column | B | 45.812  | 80.149 | *** | P<0.001 |
| Column  | A | vs | Column | C | 43.569  | 76.226 | *** | P<0.001 |
| Column  | A | vs | Column | D | 11.007  | 19.933 | *** | P<0.001 |
| Column  | A | vs | Column | E | 7.669   | 11.619 | *** | P<0.001 |
| Column  | A | vs | Column | F | 18.234  | 27.627 | *** | P<0.001 |
| Column  | A | vs | Column | G | 2.148   | 3.759  | ns  | P>0.05  |
| Column  | A | vs | Column | H | 7.78    | 14.52  | *** | P<0.001 |
| Column  | A | vs | Column | I | 1.1     | 2.158  | ns  | P>0.05  |
| Column  | A | vs | Column | J | 44.711  | 91.345 | *** | P<0.001 |
| Column  | B | vs | Column | C | -2.242  | 3.398  | ns  | P>0.05  |
| Column  | B | vs | Column | D | -34.804 | 54.104 | *** | P<0.001 |
| Column  | B | vs | Column | E | -38.143 | 51.691 | *** | P<0.001 |
| Column  | B | vs | Column | F | -27.578 | 37.373 | *** | P<0.001 |
| Column  | B | vs | Column | G | -43.663 | 66.156 | *** | P<0.001 |
| Column  | B | vs | Column | H | -38.032 | 60.436 | *** | P<0.001 |
| Column  | B | vs | Column | I | -44.712 | 73.647 | *** | P<0.001 |
| Column  | B | vs | Column | J | -1.101  | 1.865  | ns  | P>0.05  |
| Column  | C | vs | Column | D | -32.562 | 50.618 | *** | P<0.001 |
| Column  | C | vs | Column | E | -35.9   | 48.652 | *** | P<0.001 |
| Column  | C | vs | Column | F | -25.335 | 34.334 | *** | P<0.001 |
| Column  | C | vs | Column | G | -41.421 | 62.759 | *** | P<0.001 |
| Column  | C | vs | Column | H | -35.789 | 56.873 | *** | P<0.001 |
| Column  | C | vs | Column | I | -42.47  | 69.953 | *** | P<0.001 |
| Column  | C | vs | Column | J | 1.141   | 1.933  | ns  | P>0.05  |
| Column  | D | vs | Column | E | -3.338  | 4.617  | *   | P<0.05  |
| Column  | D | vs | Column | F | 7.227   | 9.995  | *** | P<0.001 |
| Column  | D | vs | Column | G | -8.859  | 13.771 | *** | P<0.001 |
| Column  | D | vs | Column | H | -3.227  | 5.276  | *   | P<0.05  |
| Column  | D | vs | Column | I | -9.908  | 16.824 | *** | P<0.001 |
| Column  | D | vs | Column | J | 33.703  | 58.965 | *** | P<0.001 |
| Column  | E | vs | Column | F | 10.565  | 13.07  | *** | P<0.001 |
| Column  | E | vs | Column | G | -5.521  | 7.481  | *** | P<0.001 |
| Column  | E | vs | Column | H | 0.1111  | 0.1563 | ns  | P>0.05  |
| Column  | E | vs | Column | I | -6.569  | 9.507  | *** | P<0.001 |
| Column  | E | vs | Column | J | 37.042  | 54.771 | *** | P<0.001 |
| Column  | F | vs | Column | G | -16.086 | 21.799 | *** | P<0.001 |
| Column  | F | vs | Column | H | -10.454 | 14.712 | *** | P<0.001 |
| Column  | F | vs | Column | I | -17.134 | 24.796 | *** | P<0.001 |
| Column  | F | vs | Column | J | 26.477  | 39.149 | *** | P<0.001 |
| Column  | G | vs | Column | H | 5.632   | 8.949  | *** | P<0.001 |

|         |   |    |        |   |          |        |     |         |
|---------|---|----|--------|---|----------|--------|-----|---------|
| Column  | G | vs | Column | I | -1.049   | 1.728  | ns  | P>0.05  |
| Column  | G | vs | Column | J | 42.562   | 72.1   | *** | P<0.001 |
| Column  | H | vs | Column | I | -6.68    | 11.647 | *** | P<0.001 |
| Column  | H | vs | Column | J | 36.931   | 66.449 | *** | P<0.001 |
| Column  | I | vs | Column | J | 43.611   | 82.202 | *** | P<0.001 |
| Proline |   |    |        |   |          |        |     |         |
| Column  | A | vs | Column | B | 6.273    | 38.229 | *** | P<0.001 |
| Column  | A | vs | Column | C | 4.163    | 25.372 | *** | P<0.001 |
| Column  | A | vs | Column | D | 1.36     | 8.288  | *** | P<0.001 |
| Column  | A | vs | Column | E | -0.01167 | 0.0711 | ns  | P>0.05  |
| Column  | A | vs | Column | F | 0.6367   | 3.88   | ns  | P>0.05  |
| Column  | A | vs | Column | G | 4.756    | 32.861 | *** | P<0.001 |
| Column  | A | vs | Column | H | 1.408    | 8.583  | *** | P<0.001 |
| Column  | B | vs | Column | C | -2.11    | 11.135 | *** | P<0.001 |
| Column  | B | vs | Column | D | -4.913   | 25.93  | *** | P<0.001 |
| Column  | B | vs | Column | E | -6.285   | 33.169 | *** | P<0.001 |
| Column  | B | vs | Column | F | -5.637   | 29.747 | *** | P<0.001 |
| Column  | B | vs | Column | G | -1.518   | 8.774  | *** | P<0.001 |
| Column  | B | vs | Column | H | -4.865   | 25.675 | *** | P<0.001 |
| Column  | C | vs | Column | D | -2.803   | 14.795 | *** | P<0.001 |
| Column  | C | vs | Column | E | -4.175   | 22.034 | *** | P<0.001 |
| Column  | C | vs | Column | F | -3.527   | 18.612 | *** | P<0.001 |
| Column  | C | vs | Column | G | 0.5922   | 3.424  | ns  | P>0.05  |
| Column  | C | vs | Column | H | -2.755   | 14.54  | *** | P<0.001 |
| Column  | D | vs | Column | E | -1.372   | 7.239  | *** | P<0.001 |
| Column  | D | vs | Column | F | -0.7233  | 3.817  | ns  | P>0.05  |
| Column  | D | vs | Column | G | 3.396    | 19.631 | *** | P<0.001 |
| Column  | D | vs | Column | H | 0.04833  | 0.2551 | ns  | P>0.05  |
| Column  | E | vs | Column | F | 0.6483   | 3.422  | ns  | P>0.05  |
| Column  | E | vs | Column | G | 4.767    | 27.561 | *** | P<0.001 |
| Column  | E | vs | Column | H | 1.42     | 7.494  | *** | P<0.001 |
| Column  | F | vs | Column | G | 4.119    | 23.813 | *** | P<0.001 |
| Column  | F | vs | Column | H | 0.7717   | 4.073  | ns  | P>0.05  |
| Column  | G | vs | Column | H | -3.347   | 19.352 | *** | P<0.001 |
| Glycine |   |    |        |   |          |        |     |         |
| Column  | A | vs | Column | B | 4.239    | 23.988 | *** | P<0.001 |
| Column  | A | vs | Column | C | 3.079    | 15.504 | *** | P<0.001 |
| Column  | A | vs | Column | D | 0.677    | 3.409  | ns  | P>0.05  |
| Column  | A | vs | Column | E | 0.187    | 0.9415 | ns  | P>0.05  |
| Column  | A | vs | Column | F | 0.2903   | 1.462  | ns  | P>0.05  |
| Column  | A | vs | Column | G | 3.23     | 16.264 | *** | P<0.001 |
| Column  | A | vs | Column | H | 0.7203   | 3.627  | ns  | P>0.05  |
| Column  | B | vs | Column | C | -1.16    | 5.722  | **  | P<0.01  |
| Column  | B | vs | Column | D | -3.562   | 17.573 | *** | P<0.001 |
| Column  | B | vs | Column | E | -4.052   | 19.99  | *** | P<0.001 |
| Column  | B | vs | Column | F | -3.949   | 19.48  | *** | P<0.001 |
| Column  | B | vs | Column | G | -1.009   | 4.977  | *   | P<0.05  |
| Column  | B | vs | Column | H | -3.519   | 17.359 | *** | P<0.001 |
| Column  | C | vs | Column | D | -2.402   | 10.818 | *** | P<0.001 |

|           |   |    |        |   |         |        |     |         |
|-----------|---|----|--------|---|---------|--------|-----|---------|
| Column    | C | vs | Column | E | -2.892  | 13.025 | *** | P<0.001 |
| Column    | C | vs | Column | F | -2.789  | 12.559 | *** | P<0.001 |
| Column    | C | vs | Column | G | 0.151   | 0.68   | ns  | P>0.05  |
| Column    | C | vs | Column | H | -2.359  | 10.623 | *** | P<0.001 |
| Column    | D | vs | Column | E | -0.49   | 2.207  | ns  | P>0.05  |
| Column    | D | vs | Column | F | -0.3867 | 1.741  | ns  | P>0.05  |
| Column    | D | vs | Column | G | 2.553   | 11.498 | *** | P<0.001 |
| Column    | D | vs | Column | H | 0.04333 | 0.1951 | ns  | P>0.05  |
| Column    | E | vs | Column | F | 0.1033  | 0.4653 | ns  | P>0.05  |
| Column    | E | vs | Column | G | 3.043   | 13.705 | *** | P<0.001 |
| Column    | E | vs | Column | H | 0.5333  | 2.402  | ns  | P>0.05  |
| Column    | F | vs | Column | G | 2.94    | 13.239 | *** | P<0.001 |
| Column    | F | vs | Column | H | 0.43    | 1.936  | ns  | P>0.05  |
| Column    | G | vs | Column | H | -2.51   | 11.303 | *** | P<0.001 |
| Glutamate |   |    |        |   |         |        |     |         |
| Column    | A | vs | Column | B | 0.1067  | 2.258  | ns  | P>0.05  |
| Column    | A | vs | Column | C | 0.4533  | 10.513 | *** | P<0.001 |
| Column    | A | vs | Column | D | 0.8117  | 17.832 | *** | P<0.001 |
| Column    | A | vs | Column | E | 0.3528  | 7.751  | *** | P<0.001 |
| Column    | B | vs | Column | C | 0.3467  | 8.04   | *** | P<0.001 |
| Column    | B | vs | Column | D | 0.705   | 15.488 | *** | P<0.001 |
| Column    | B | vs | Column | E | 0.2461  | 5.408  | **  | P<0.01  |
| Column    | C | vs | Column | D | 0.3583  | 8.691  | *** | P<0.001 |
| Column    | C | vs | Column | E | -0.1005 | 2.438  | ns  | P>0.05  |
| Column    | D | vs | Column | E | -0.4589 | 10.492 | *** | P<0.001 |
| Arginine  |   |    |        |   |         |        |     |         |
| Column    | A | vs | Column | B | 1.022   | 5.077  | **  | P<0.01  |
| Column    | A | vs | Column | C | 6.178   | 31.628 | *** | P<0.001 |
| Column    | A | vs | Column | D | 2.271   | 11.627 | *** | P<0.001 |
| Column    | A | vs | Column | E | 2.365   | 11.745 | *** | P<0.001 |
| Column    | B | vs | Column | C | 5.156   | 25.608 | *** | P<0.001 |
| Column    | B | vs | Column | D | 1.249   | 6.204  | *** | P<0.001 |
| Column    | B | vs | Column | E | 1.343   | 6.48   | *** | P<0.001 |
| Column    | C | vs | Column | D | -3.907  | 20.001 | *** | P<0.001 |
| Column    | C | vs | Column | E | -3.813  | 18.94  | *** | P<0.001 |
| Column    | D | vs | Column | E | 0.09347 | 0.4643 | ns  | P>0.05  |

| Fig. 3     |   |    |        |            |        |              |     |         |
|------------|---|----|--------|------------|--------|--------------|-----|---------|
| Comparison |   |    |        | Difference | q      | Significance | p   |         |
| Leucine    |   |    |        |            |        |              |     |         |
| Column     | A | vs | Column | B          | 3.315  | 4.516        | *   | P<0.05  |
| Column     | A | vs | Column | C          | 38.13  | 51.935       | *** | P<0.001 |
| Column     | A | vs | Column | D          | 25.699 | 35.003       | *** | P<0.001 |
| Column     | A | vs | Column | E          | 6.421  | 8.745        | *** | P<0.001 |
| Column     | A | vs | Column | F          | 8.383  | 11.418       | *** | P<0.001 |
| Column     | A | vs | Column | G          | 5.304  | 7.224        | *** | P<0.001 |
| Column     | B | vs | Column | C          | 34.815 | 47.419       | *** | P<0.001 |
| Column     | B | vs | Column | D          | 22.384 | 30.488       | *** | P<0.001 |
| Column     | B | vs | Column | E          | 3.106  | 4.23         | ns  | P>0.05  |

|           |   |    |        |   |         |        |     |         |
|-----------|---|----|--------|---|---------|--------|-----|---------|
| Column    | B | vs | Column | F | 5.068   | 6.903  | *** | P<0.001 |
| Column    | B | vs | Column | G | 1.988   | 2.708  | ns  | P>0.05  |
| Column    | C | vs | Column | D | -12.431 | 16.932 | *** | P<0.001 |
| Column    | C | vs | Column | E | -31.709 | 43.189 | *** | P<0.001 |
| Column    | C | vs | Column | F | -29.747 | 40.516 | *** | P<0.001 |
| Column    | C | vs | Column | G | -32.826 | 44.711 | *** | P<0.001 |
| Column    | D | vs | Column | E | -19.278 | 26.258 | *** | P<0.001 |
| Column    | D | vs | Column | F | -17.316 | 23.585 | *** | P<0.001 |
| Column    | D | vs | Column | G | -20.395 | 27.78  | *** | P<0.001 |
| Column    | E | vs | Column | F | 1.962   | 2.673  | ns  | P>0.05  |
| Column    | E | vs | Column | G | -1.117  | 1.522  | ns  | P>0.05  |
| Column    | F | vs | Column | G | -3.08   | 4.195  | ns  | P>0.05  |
| Glutamine |   |    |        |   |         |        |     |         |
| Column    | A | vs | Column | B | 30.356  | 31.521 | *** | P<0.001 |
| Column    | A | vs | Column | C | 26.263  | 28.11  | *** | P<0.001 |
| Column    | A | vs | Column | D | 3.201   | 3.427  | ns  | P>0.05  |
| Column    | A | vs | Column | E | 10      | 10.703 | *** | P<0.001 |
| Column    | A | vs | Column | F | 5.11    | 5.469  | **  | P<0.01  |
| Column    | A | vs | Column | G | 0.6032  | 0.6456 | ns  | P>0.05  |
| Column    | B | vs | Column | C | -4.094  | 4.251  | ns  | P>0.05  |
| Column    | B | vs | Column | D | -27.155 | 28.197 | *** | P<0.001 |
| Column    | B | vs | Column | E | -20.357 | 21.138 | *** | P<0.001 |
| Column    | B | vs | Column | F | -25.246 | 26.215 | *** | P<0.001 |
| Column    | B | vs | Column | G | -29.753 | 30.895 | *** | P<0.001 |
| Column    | C | vs | Column | D | -23.061 | 24.683 | *** | P<0.001 |
| Column    | C | vs | Column | E | -16.263 | 17.407 | *** | P<0.001 |
| Column    | C | vs | Column | F | -21.153 | 22.64  | *** | P<0.001 |
| Column    | C | vs | Column | G | -25.66  | 27.464 | *** | P<0.001 |
| Column    | D | vs | Column | E | 6.798   | 7.276  | *** | P<0.001 |
| Column    | D | vs | Column | F | 1.909   | 2.043  | ns  | P>0.05  |
| Column    | D | vs | Column | G | -2.598  | 2.781  | ns  | P>0.05  |
| Column    | E | vs | Column | F | -4.889  | 5.233  | **  | P<0.01  |
| Column    | E | vs | Column | G | -9.396  | 10.057 | *** | P<0.001 |
| Column    | F | vs | Column | G | -4.507  | 4.824  | *   | P<0.05  |
| Alanine   |   |    |        |   |         |        |     |         |
| Column    | A | vs | Column | B | 65.213  | 45.967 | *** | P<0.001 |
| Column    | A | vs | Column | C | 59.771  | 45.041 | *** | P<0.001 |
| Column    | A | vs | Column | D | 5.202   | 3.92   | ns  | P>0.05  |
| Column    | A | vs | Column | E | 11.305  | 8.519  | *** | P<0.001 |
| Column    | A | vs | Column | F | 10.302  | 7.763  | *** | P<0.001 |
| Column    | A | vs | Column | G | 1.263   | 0.9518 | ns  | P>0.05  |
| Column    | B | vs | Column | C | -5.441  | 3.835  | ns  | P>0.05  |
| Column    | B | vs | Column | D | -60.01  | 42.3   | *** | P<0.001 |
| Column    | B | vs | Column | E | -53.907 | 37.998 | *** | P<0.001 |
| Column    | B | vs | Column | F | -54.911 | 38.706 | *** | P<0.001 |
| Column    | B | vs | Column | G | -63.95  | 45.077 | *** | P<0.001 |
| Column    | C | vs | Column | D | -54.569 | 41.121 | *** | P<0.001 |
| Column    | C | vs | Column | E | -48.466 | 36.522 | *** | P<0.001 |
| Column    | C | vs | Column | F | -49.47  | 37.278 | *** | P<0.001 |

|           |   |    |        |   |         |        |     |         |
|-----------|---|----|--------|---|---------|--------|-----|---------|
| Column    | C | vs | Column | G | -58.508 | 44.089 | *** | P<0.001 |
| Column    | D | vs | Column | E | 6.103   | 4.599  | *   | P<0.05  |
| Column    | D | vs | Column | F | 5.099   | 3.843  | ns  | P>0.05  |
| Column    | D | vs | Column | G | -3.939  | 2.969  | ns  | P>0.05  |
| Column    | E | vs | Column | F | -1.004  | 0.7564 | ns  | P>0.05  |
| Column    | E | vs | Column | G | -10.042 | 7.567  | *** | P<0.001 |
| Column    | F | vs | Column | G | -9.039  | 6.811  | *** | P<0.001 |
| Proline   |   |    |        |   |         |        |     |         |
| Column    | A | vs | Column | B | 12.006  | 16.37  | *** | P<0.001 |
| Column    | A | vs | Column | C | 10.449  | 14.686 | *** | P<0.001 |
| Column    | A | vs | Column | D | 2.229   | 3.039  | ns  | P>0.05  |
| Column    | A | vs | Column | E | 3.327   | 4.676  | *   | P<0.05  |
| Column    | A | vs | Column | F | 10.763  | 13.53  | *** | P<0.001 |
| Column    | A | vs | Column | G | 5.051   | 7.099  | *** | P<0.001 |
| Column    | B | vs | Column | C | -1.557  | 2.122  | ns  | P>0.05  |
| Column    | B | vs | Column | D | -9.777  | 12.956 | *** | P<0.001 |
| Column    | B | vs | Column | E | -8.679  | 11.834 | *** | P<0.001 |
| Column    | B | vs | Column | F | -1.243  | 1.525  | ns  | P>0.05  |
| Column    | B | vs | Column | G | -6.955  | 9.483  | *** | P<0.001 |
| Column    | C | vs | Column | D | -8.221  | 11.209 | *** | P<0.001 |
| Column    | C | vs | Column | E | -7.123  | 10.01  | *** | P<0.001 |
| Column    | C | vs | Column | F | 0.3133  | 0.3939 | ns  | P>0.05  |
| Column    | C | vs | Column | G | -5.399  | 7.588  | *** | P<0.001 |
| Column    | D | vs | Column | E | 1.098   | 1.497  | ns  | P>0.05  |
| Column    | D | vs | Column | F | 8.534   | 10.469 | *** | P<0.001 |
| Column    | D | vs | Column | G | 2.822   | 3.848  | ns  | P>0.05  |
| Column    | E | vs | Column | F | 7.436   | 9.347  | *** | P<0.001 |
| Column    | E | vs | Column | G | 1.724   | 2.423  | ns  | P>0.05  |
| Column    | F | vs | Column | G | -5.712  | 7.18   | *** | P<0.001 |
| Glycine   |   |    |        |   |         |        |     |         |
| Column    | A | vs | Column | B | 2.116   | 18.266 | *** | P<0.001 |
| Column    | A | vs | Column | C | 0.1239  | 1.07   | ns  | P>0.05  |
| Column    | A | vs | Column | D | -0.1208 | 1.043  | ns  | P>0.05  |
| Column    | B | vs | Column | C | -1.992  | 17.196 | *** | P<0.001 |
| Column    | B | vs | Column | D | -2.237  | 19.309 | *** | P<0.001 |
| Column    | C | vs | Column | D | -0.2447 | 2.113  | ns  | P>0.05  |
| Glutamate |   |    |        |   |         |        |     |         |
| Column    | A | vs | Column | B | 1.275   | 5.497  | **  | P<0.01  |
| Column    | A | vs | Column | C | 4.668   | 20.135 | *** | P<0.001 |
| Column    | A | vs | Column | D | -0.9223 | 3.859  | ns  | P>0.05  |
| Column    | A | vs | Column | E | -0.1427 | 0.5201 | ns  | P>0.05  |
| Column    | A | vs | Column | F | -0.2483 | 1.039  | ns  | P>0.05  |
| Column    | B | vs | Column | C | 3.394   | 14.638 | *** | P<0.001 |
| Column    | B | vs | Column | D | -2.197  | 9.192  | *** | P<0.001 |
| Column    | B | vs | Column | E | -1.417  | 5.166  | **  | P<0.01  |
| Column    | B | vs | Column | F | -1.523  | 6.372  | *** | P<0.001 |
| Column    | C | vs | Column | D | -5.591  | 23.393 | *** | P<0.001 |
| Column    | C | vs | Column | E | -4.811  | 17.538 | *** | P<0.001 |
| Column    | C | vs | Column | F | -4.917  | 20.573 | *** | P<0.001 |

|          |   |    |        |   |         |        |     |         |
|----------|---|----|--------|---|---------|--------|-----|---------|
| Column   | D | vs | Column | E | 0.7796  | 2.781  | ns  | P>0.05  |
| Column   | D | vs | Column | F | 0.674   | 2.741  | ns  | P>0.05  |
| Column   | E | vs | Column | F | -0.1056 | 0.3766 | ns  | P>0.05  |
| Arginine |   |    |        |   |         |        |     |         |
| Column   | A | vs | Column | B | -0.8931 | 1.264  | ns  | P>0.05  |
| Column   | A | vs | Column | C | 15.693  | 22.209 | *** | P<0.001 |
| Column   | A | vs | Column | D | 0.4964  | 0.6571 | ns  | P>0.05  |
| Column   | A | vs | Column | E | 8.861   | 12.541 | *** | P<0.001 |
| Column   | B | vs | Column | C | 16.586  | 23.473 | *** | P<0.001 |
| Column   | B | vs | Column | D | 1.389   | 1.839  | ns  | P>0.05  |
| Column   | B | vs | Column | E | 9.754   | 13.805 | *** | P<0.001 |
| Column   | C | vs | Column | D | -15.196 | 20.117 | *** | P<0.001 |
| Column   | C | vs | Column | E | -6.831  | 9.668  | *** | P<0.001 |
| Column   | D | vs | Column | E | 8.365   | 11.074 | *** | P<0.001 |

#### References:

1. Arriza JL, Fairman WA, Wadiche JI, Murdoch GH, Kavanaugh MP, Amara SG. Functional comparisons of three glutamate transporter subtypes cloned from human motor cortex. *J Neurosci* **14**, 5559-5569 (1994).
2. Kanai Y, Nussberger S, Romero MF, Boron WF, Hebert SC, Hediger MA. Electrogenic properties of the epithelial and neuronal high affinity glutamate transporter. *J Biol Chem* **270**, 16561-16568 (1995).
3. Watzke N, Rauen T, Bamberg E, Grewer C. On the mechanism of proton transport by the neuronal excitatory amino acid carrier 1. *J Gen Physiol* **116**, 609-622. (2000).
4. Wang J, Zielewicz L, Grewer C. A K(+)/Na(+) co-binding state: Simultaneous versus competitive binding of K(+) and Na(+) to glutamate transporters. *J Biol Chem* **294**, 12180-12190 (2019).
5. Arriza JL, *et al.* Cloning and expression of a human neutral amino acid transporter with structural similarity to the glutamate transporter gene family. *J Biol Chem* **268**, 15329-15332 (1993).
6. Utsunomiya-Tate N, Endou H, Kanai Y. Cloning and functional characterization of a system ASC-like Na<sup>+</sup>-dependent neutral amino acid transporter. *J Biol Chem* **271**, 14883-14890. (1996).
7. Scalise M, Pochini L, Panni S, Pingitore P, Hedfalk K, Indiveri C. Transport mechanism and regulatory properties of the human amino acid transporter ASCT2 (SLC1A5). *Amino Acids* **46**, 2463-2475 (2014).
8. Fairman WA, Vandenberg RJ, Arriza JL, Kavanaugh MP, Amara SG. An excitatory amino-acid transporter with properties of a ligand-gated chloride channel. *Nature* **375**, 599-603 (1995).
9. Arriza JL, Eliasof S, Kavanaugh MP, Amara SG. Excitatory amino acid transporter 5, a retinal glutamate transporter coupled to a chloride conductance. *Proc Natl Acad Sci U S A* **94**, 4155-4160 (1997).
10. Liu QR, Lopez-Corcuera B, Mandiyan S, Nelson H, Nelson N. Cloning and expression of a spinal cord- and brain-specific glycine transporter with novel structural features. *J Biol Chem* **268**, 22802-22808 (1993).
11. Lopez-Corcuera B, Martinez-Maza R, Nunez E, Roux M, Supplisson S, Aragon C. Differential properties of two stably expressed brain-specific glycine transporters. *J Neurochem* **71**, 2211-2219 (1998).

12. Ramamoorthy S, *et al.* Functional characterization and chromosomal localization of a cloned taurine transporter from human placenta. *Biochem J* **300**, 893-900. (1994).
13. Shafqat S, *et al.* Human brain-specific L-proline transporter: molecular cloning, functional expression, and chromosomal localization of the gene in human and mouse genomes. *Mol Pharmacol* **48**, 219-229 (1995).
14. Sloan JL, Mager S. Cloning and functional expression of a human Na<sup>(+)</sup> and Cl<sup>(-)</sup>-dependent neutral and cationic amino acid transporter B(0<sup>+</sup>). *J Biol Chem* **274**, 23740-23745 (1999).
15. Broer A, *et al.* The orphan transporter v7-3 (slc6a15) is a Na<sup>+</sup>-dependent neutral amino acid transporter (B0AT2). *Biochem J* **393**, 421-430 (2006).
16. Takanaga H, Mackenzie B, Peng JB, Hediger MA. Characterization of a branched-chain amino-acid transporter SBAT1 (SLC6A15) that is expressed in human brain. *Biochem Biophys Res Commun* **337**, 892-900 (2005).
17. Zaia KA, Reimer RJ. Synaptic Vesicle Protein NTT4/XT1 (SLC6A17) Catalyzes Na<sup>+</sup>-coupled Neutral Amino Acid Transport. *J Biol Chem* **284**, 8439-8448 (2009).
18. Bohmer C, *et al.* Characterization of mouse amino acid transporter B0AT1 (slc6a19). *Biochem J* **389**, 745-751 (2005).
19. Cheng Q, *et al.* Identification of novel inhibitors of the amino acid transporter B(0) AT1 (SLC6A19), a potential target to induce protein restriction and to treat type 2 diabetes. *Br J Pharmacol* **174**, 468-482 (2017).
20. Kowalczuk S, Broer A, Munzinger M, Tietze N, Klingel K, Broer S. Molecular cloning of the mouse IMINO system: an Na<sup>+</sup>- and Cl<sup>-</sup>-dependent proline transporter. *Biochemical Journal* **386**, 417-422 (2005).
21. Takanaga H, Mackenzie B, Suzuki Y, Hediger MA. Identification of Mammalian Proline Transporter SIT1 (SLC6A20) with Characteristics of Classical System Imino. *J Biol Chem* **280**, 8974-8984 (2005).
22. Wang H, Kavanaugh MP, North RA, Kabat D. Cell-surface receptor for ecotropic murine retroviruses is a basic amino-acid transporter. *Nature* **352**, 729-731 (1991).
23. Kavanaugh MP, *et al.* Control of cationic amino acid transport and retroviral receptor functions in a membrane protein family. *J Biol Chem* **269**, 15445-15450 (1994).
24. Hosokawa H, Sawamura T, Kobayashi S, Ninomiya H, Miwa S, Masaki T. Cloning and characterization of a brain-specific cationic amino acid transporter. *J Biol Chem* **272**, 8717-8722 (1997).
25. Yanagida O, *et al.* Human L-type amino acid transporter 1 (LAT1): characterization of function and expression in tumor cell lines. *Biochim Biophys Acta* **1514**, 291-302. (2001).
26. Meier C, Ristic Z, Klauser S, Verrey F. Activation of system L heterodimeric amino acid exchangers by intracellular substrates. *Embo J* **21**, 580-589 (2002).
27. Broer A, Wagner CA, Lang F, Broer S. The heterodimeric amino acid transporter 4F2hc/y+LAT2 mediates arginine efflux in exchange with glutamine. *Biochem J* **349 Pt 3**, 787-795 (2000).



28. Chubb S, Kingsland AL, Broer A, Broer S. Mutation of the 4F2 heavy-chain carboxy terminus causes y<sup>+</sup>LAT2 light-chain dysfunction. *Mol Membr Biol* **23**, 255-267 (2006).
29. Pfeiffer R, Rossier G, Spindler B, Meier C, Kuhn L, Verrey F. Amino acid transport of y<sup>+</sup>L-type by heterodimers of 4F2hc/CD98 and members of the glycoprotein-associated amino acid transporter family. *Embo J* **18**, 49-57 (1999).
30. Kanai Y, *et al.* Transport properties of a system y<sup>+</sup>L neutral and basic amino acid transporter. Insights into the mechanisms of substrate recognition. *J Biol Chem* **275**, 20787-20793. (2000).
31. Segawa H, Fukasawa Y, Miyamoto K, Takeda E, Endou H, Kanai Y. Identification and functional characterization of a Na<sup>+</sup>-independent neutral amino acid transporter with broad substrate selectivity. *J Biol Chem* **274**, 19745-19751 (1999).
32. Mizoguchi K, *et al.* Human cystinuria-related transporter: localization and functional characterization. *Kidney Int* **59**, 1821-1833. (2001).
33. Torras-Llort M, *et al.* Sequential amino acid exchange across b(0,+)-like system in chicken brush border jejunum. *J Membr Biol* **180**, 213-220. (2001).
34. Fukasawa Y, *et al.* Identification and characterization of a Na<sup>+</sup>-independent neutral amino acid transporter that associates with the 4F2 heavy chain and exhibits substrate selectivity for small neutral D- and L-amino acids. *J Biol Chem* **275**, 9690-9698. (2000).
35. Bassi MT, *et al.* Identification and characterisation of human xCT that co-expresses, with 4F2 heavy chain, the amino acid transport activity system xc. *Pflugers Arch* **442**, 286-296. (2001).
36. Matsuo H, *et al.* Identification of a novel Na<sup>+</sup>-independent acidic amino acid transporter with structural similarity to the member of a heterodimeric amino acid transporter family associated with unknown heavy chains. *J Biol Chem* **277**, 21017-21026 (2002).
37. Nagamori S, *et al.* Novel cystine transporter in renal proximal tubule identified as a missing partner of cystinuria-related plasma membrane protein rBAT/SLC3A1. *Proc Natl Acad Sci U S A* **113**, 775-780 (2016).
38. Kim DK, Kanai Y, Chairoungdua A, Matsuo H, Cha SH, Endou H. Expression cloning of a Na<sup>+</sup>-independent aromatic amino acid transporter with structural similarity to H<sup>+</sup>/monocarboxylate transporters. *J Biol Chem* **276**, 17221-17228 (2001).
39. Boll M, Foltz M, Rubio-Aliaga I, Kottra G, Daniel H. Functional characterization of two novel mammalian electrogenic proton-dependent amino acid cotransporters. *J Biol Chem* **277**, 22966-22973 (2002).
40. Pillai SM, Meredith D. SLC36A4 (hPAT4) Is a High Affinity Amino Acid Transporter When Expressed in *Xenopus laevis* Oocytes. *J Biol Chem* **286**, 2455-2460 (2011).
41. Albers A, *et al.* Na<sup>+</sup> transport by the neural glutamine transporter ATA1. *Pflugers Archiv-European Journal of Physiology* **443**, 92-101 (2001).
42. Mackenzie B, Schafer MK, Erickson JD, Hediger MA, Weihe E, Varoqui H. Functional properties and cellular distribution of the system A glutamine transporter SNAT1 support specialized roles in central neurons. *J Biol Chem* **278**, 23720-23730 (2003).

43. Yao D, *et al.* A novel system A isoform mediating Na<sup>+</sup>/neutral amino acid cotransport. *J Biol Chem* **275**, 22790-22797 (2000).
44. Fei YJ, *et al.* Primary structure, genomic organization, and functional and electrogenic characteristics of human system N 1, a Na<sup>+</sup>- and H<sup>+</sup>-coupled glutamine transporter. *J Biol Chem* **275**, 23707-23717 (2000).
45. Broer A, *et al.* Regulation of the glutamine transporter SN1 by extracellular pH and intracellular sodium ions. *J Physiol* **539**, 3-14 (2002).
46. Sugawara M, *et al.* Structure and function of ATA3, a new subtype of amino acid transport system A, primarily expressed in the liver and skeletal muscle. *Biochim Biophys Acta* **1509**, 7-13 (2000).
47. Hatanaka T, *et al.* Evidence for the transport of neutral as well as cationic amino acids by ATA3, a novel and liver-specific subtype of amino acid transport system A. *Biochim Biophys Acta* **1510**, 10-17 (2001).
48. Nakanishi T, *et al.* Structure, function, and tissue expression pattern of human SN2, a subtype of the amino acid transport system N. *Biochem Biophys Res Commun* **281**, 1343-1348 (2001).
49. Babu E, *et al.* Identification of a novel system L amino acid transporter structurally distinct from heterodimeric amino acid transporters. *J Biol Chem* **278**, 43838-43845 (2003).
50. Bodoy S, Martin L, Zorzano A, Palacin M, Estevez R, Bertran J. Identification of LAT4, a novel amino acid transporter with system L activity. *J Biol Chem* **280**, 12002-12011 (2005).
